# Supplementary material for: Evaluation of Psychological Wellbeing and Social Impact of Combined Facial and Truncal Acne: a Multi-national, Mixed-Methods Study
Source: Springer Nature journal article supplement (doi:10.1007/s13555-022-00768-0), 2022-07-29
Supplement: MOESM1 [file 23318150]

**Title**

Evaluation of psychological well-being and social impact of combined facial and truncal acne: A multi-national, mixed-methods study

**Authors**

Jerry Tan<sup>1</sup>; Stefan Beissert<sup>2</sup>; Fran Cook-Bolden<sup>3</sup>; Rajeev Chavda<sup>4</sup>; Julie Harper<sup>5</sup>; Adelaide Hebert<sup>6</sup>; Edward Lain<sup>7</sup>; Alison Layton<sup>8</sup>; Marco Rocha<sup>9</sup>; Jonathan Weiss<sup>10</sup>; Brigitte Dréno<sup>11</sup>

**Affiliations**

<sup>1</sup>Western University Canada, Schulich School of Medicine and Dentistry, 2224 Walker Rd, Suite 300 Windsor, Ontario N8W 5L7

<sup>2</sup>Department of Dermatology, University Hospital Carl Gustav Carus, TU Dresden, Fetscherstrasse 74, D-01307 Dresden, Germany

<sup>3</sup>Mount Sinai Department of Dermatology, New York, 5 East 98th Street, New York, NY 10029

<sup>4</sup>Galderma SA Zählerweg 10, 6300 Zug, Switzerland,

<sup>5</sup>The Dermatology and Skin Care Center of Birmingham, 2470 Rocky Ridge Rd # 100, Vestavia Hills, AL 35243, USA

<sup>6</sup>The University of Texas Medical School – Houston, 6655 Travis, Suite 980, Houston, TX 77030

<sup>7</sup>Austin Institute for Clinical Research, 1601 E Pflugerville Pkwy Suite 1101, Pflugerville, TX

<sup>8</sup>Hull York Medical School, University Rd, Heslington, York YO10 5DD, UK

<sup>9</sup>Federal University of São Paulo, R. Sena Madureira, 1500 - Vila Clementino, São Paulo - SP, 04021-001, Brazil

<sup>10</sup>Georgia Dermatology Partners, (Formerly, Gwinnett Dermatology, PC), 2383 Pate St., N, Snellville, GA 30078

<sup>11</sup>Unité Thérapie Cellulaire et Génique, Faculté de Médecine de Nantes, CHU Nantes - Place Alexis Ricordeau, 44093 Cedex 01, France

**Correspondent author (address, telephone and fax numbers, and e-mail address)**

Jerry Tan

Email: [jerrytan1230@outlook.com](mailto:jerrytan1230@outlook.com)

Postal address: 2224 WALKER ROAD, SUITE 300 WINDSOR, ONTARIO N8W 5L7, CANADA

Tel: +1 5199718874

**Supplementary Table 1: Characteristics of participants from the qualitative survey**

|                                                                                                                    |            |
|--------------------------------------------------------------------------------------------------------------------|------------|
| Study participants, n                                                                                              | 30         |
| Age range, n (%)                                                                                                   |            |
| 13 to < 25 years                                                                                                   | 21 (70.0%) |
| 26 to < 40 years                                                                                                   | 9 (30.0%)  |
| Sex, n (%)                                                                                                         |            |
| Female                                                                                                             | 17 (56.7%) |
| Male                                                                                                               | 13 (43.3%) |
| Areas affected by acne beside the face, n (%)                                                                      |            |
| Back                                                                                                               | 21 (70.0%) |
| Chest/ torso                                                                                                       | 13 (43.3)  |
| Shoulders                                                                                                          | 10 (33.3%) |
| Neck                                                                                                               | 6 (20.0%)  |
| Severity – self-assessment based on the Investigator's Global Assessment (IGA) of acne severity definitions, n (%) |            |
| Severe                                                                                                             | 26 (86.7%) |
| Moderate                                                                                                           | 4 (13.3%)  |
| Treatment currently prescribed, n (%)                                                                              |            |
| Topical                                                                                                            | 16 (53.3%) |
| Topical and systemic                                                                                               | 8 (26.7%)  |
| Systemic                                                                                                           | 5 (16.7%)  |
| Do not know                                                                                                        | 1 (3.3%)   |

**Supplementary Table 2: Characteristics of participants from the quantitative survey**

|                              |             |
|------------------------------|-------------|
| Study participants, n        | 694         |
| Age, mean (SEM) years        | 18.7 (0.55) |
| 13 to < 16 years, n (%)      | 333 (48.0%) |
| 16 to < 18 years, n (%)      | 119 (17.1%) |
| 18 to < 25 years, n (%)      | 114 (16.5%) |
| 25 to 40 years, n (%)        | 127 (18.4%) |
| Male, n (%)                  | 385 (55.5%) |
| Relationship status, n (%)   |             |
| Married/living with partner* | 465 (67.1%) |
| Single                       | 194 (27.9%) |
| Country of residence, n (%)  |             |
| US                           | 324 (46.6%) |
| Canada                       | 33 (4.7%)   |
| Brazil                       | 82 (11.9%)  |
| France                       | 121 (17.5%) |
| Germany                      | 80 (11.6%)  |
| Italy                        | 53 (7.7%)   |
| Type of residence, n (%)     |             |
| Urban                        | 412 (59.4%) |
| Suburban                     | 201 (29.0%) |
| Rural                        | 80 (11.6%)  |
| Employment status, n (%)     |             |
| Employed                     | 602 (86.7%) |
| Unemployed                   | 29 (4.2%)   |
| Student/pupil                | 46 (6.7%)   |

**Supplementary Figure 1: Distribution of participants from the quantitative survey based on the severity of acne on the face, chest, and back**

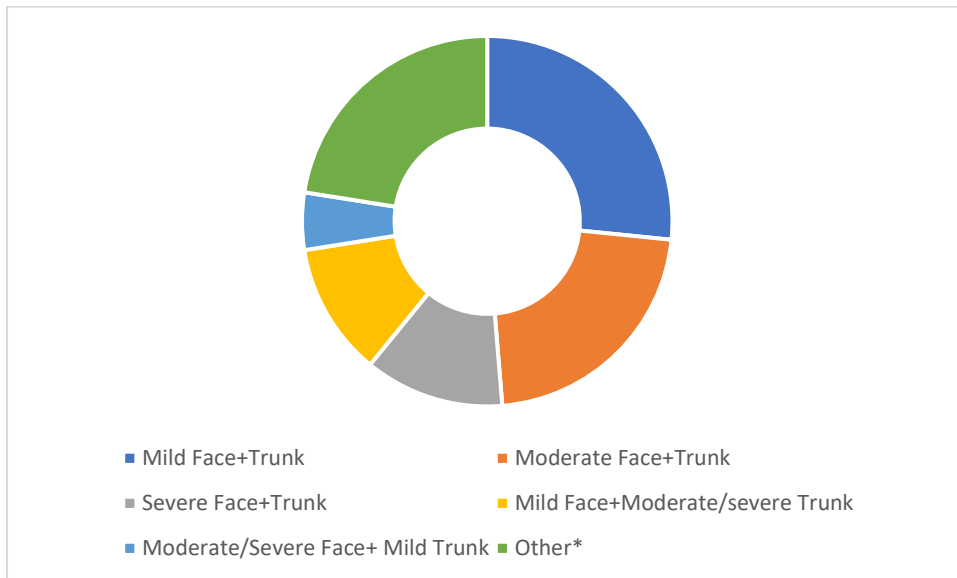

\*Other includes different combinations of severity of acne on the chest and back within the trunk variable, e.g., mild acne on the chest + moderate acne on the back.

**Burden of truncal and facial acne combined**

**60 min in-depth face to face discussion**

**DISCUSSION GUIDE – PATIENT**

**I. SELF-INTRODUCTION (5 min)**

*MODERATOR: ADAPT YOUR LANGUAGE AND QUESTIONS IF THIS IS A CHILD*

1. Let's start by introducing yourself.
  - a. your age
  - b. family situation
  - c. professional status [*Moderator: adapt if child*]
  - d. hobbies
2. Where do you live?
  - a. *Probe on:*
    - i. Do you live in a sunny, cloudy, cold, rainy area?
    - ii. City or countryside?

**II. ACNE HISTORY AND MANAGEMENT (20 min)**

1. Could you tell me where exactly you have acne on your face /body acne today?
2. When did your acne first appear, how many years ago?
  - a. How old were you then?
  - b. Where was it located?
  - c. What worried you the most at the time?
  - d. How did you initially react?
  - e. Did you try to diminish the symptoms yourself? If yes, how? What was the result?
  - f. *IF CHILD/TEENAGER:* did you tell your parents? How did they react?
3. When was your acne formally diagnosed by the healthcare professional?
  - a. What type of healthcare professional made this diagnosis?
4. About this first visit, approximately how long was it after you acne first appeared?
  - a. *IF LONG AFTER THE FIRST SYMPTOMS:* Why did you wait to see a healthcare professional?
  - b. *IF CHILD/TEENAGER:* Did you decide to consult a healthcare professional, did you ask your parents or was it your parents idea?
  - c. What prompted you to visit a healthcare professional at this time exactly?  
SPONTANEOUSLY FIRST, THEN PROMPT/
    - i. The acne got worse?
    - ii. The acne extend to other areas of the body?
    - iii. Impact of the acne on daly life?
    - iv. Something else? Please explain.
5. What did the healthcare professional say at the time? SPONTANEOUSLY FIRST
  - i. About the origins of acne? What was explained?
  - ii. About the nature of the condition? Its chronic aspect, flare ups, evolutions?
6. Was your acne on your [shoulders, chest, bust, or back] seen and acknowledged at the time as the acne on your face?
  - a. Did you spontaneously talk about this aspect of your acne or did the physician ask you first about areas other than the face that could possibly be affected?

7. What did this healthcare professional say about possible treatment?
  - a. What was explained?
8. What treatment was prescribed if any?
  - a. Was it a cream, an ointment or an oral form like a tablet or capsule?
  - b. Was this treatment intended for both your acne on your face and on your trunk [shoulders, chest, bust, or back]?
9. What other advice, if any, was given to you during this first visit to help you manage your acne?
  - a. *If not covered spontaneously, ask:*
    - i. Advice about your face cleansing routine?
    - ii. Advice about your acne on your [shoulders, chest, bust, or back]?
    - iii. Any other advice about lifestyle? Hygiene?
  - b. *If the acne on the [shoulders, chest, bust, or back] was acknowledged on the first visit, ask:* Were you given the same type of advice for your acne on your [shoulders, chest, bust, or back] ?
10. Overall, how was your first visit to this healthcare professional? How did you feel about it? Why?
  - a. To what extent was your dermatologist reassuring? Why
  - b. To what extent did s/he show empathy?
11. How many different specialists did you see for your acne management?
  - a. Please specify which specialities they are, like GP, nurse or dermatologist for instance.
12. Why did you/why didn't you change physician?
13. Was your acne on your [shoulders, chest, bust, or back] treated or managed differently at some point? Please explain why and how?
  - a. *IF NOT ALREADY CLARIFIED, ASK:* When was treatment of your truncal acne taken into account by your physician, compared to your facial acne?
14. For how long now have you been using medication prescribed by your healthcare professional to treat your acne?
  - a. Is is the same length of treatment for your acne on the face and on your [shoulders, chest, bust, or back]?
15. Beside this treatment your physician prescribed, do you use other products that can be purchased at the chemist without a prescription? What is it? For what reason do you use it?
16. Do you have a regular follow-up or do you tend to visit when you experience a flare-up or any other reason?
  - a. How frequent is it?
  - b. What is usually checked or asked to you during your follow-up visits with the dermatologist?
  - c. Do you usually go for both the acne on your face? For your acne on your [shoulders, chest, bust, or back] ? Or both?
  - d. During a typical visit, does your physician look at the acne on your [shoulders, chest, bust, or back] as much as the one on your face?
  - e. Do you talk about/ Does your physician ask about the emotional impact your acne is having on your everyday life ? Why/ why not? IF YES: What do you say? What is discussed then
17. How satisfied are you currently with the way your acne on your face and on your [shoulders, chest, bust, or back] is managed? Why? Why not?
  - a. Please rate your satisfaction level on a 5-point scale where 1 means not at all satisfied and 5 means totally satisfied. MODERATOR TO WRITE ON COMPLETION SHEET 1
18. What would you say are your unmet needs?
  - a. Why are these important to you?
19. How would you define your relationship with your current treating physician?
  - a. What do you wish they would do that they currently don't?

### III. CURRENT SITUATION AND BURDEN OF COMBINED ACNE (20 min)

20. LETTER TO MY CONDITION DISCUSSION – We asked you to complete a “*letter to my condition*” before this interview, thank you for having taken the time to do it, do you want to tell me how was it?
- How did you feel writing to your acne?
  - Was it an easy or a difficult process? What is the main message?
21. How would you describe yourself physically to someone who you never met but whom you are going to meet soon?
22. What do you think stands out in your overall appearance, looks?
23. SENTENCE COMPLETION – We are going to do a little game. I am going to give you the beginning of a sentence and you will complete it. No right or wrong answers, no need to think too hard, your spontaneous, honest answer is the only thing we care about MODERATOR: PLEASE READ ONE SENTENCE AT A TIME, GIVING SUFFICIENT TIME TO THE PARTICIPANT TO COMPLETE THE SENTENCE.
- The thing with having acne also on [shoulders, chest, bust, or back] is...*
  - Unlike people having acne only on the face, because I have acne on my [shoulders, chest, bust, or back] too, I have to...*
24. To what extent would you say also having acne on your [shoulders, chest, bust, or back] is impacting in your life?
- How differently would you describe it compared to people affected only on the face?
25. Please indicate on a 5-point scale where 1 means ‘not at all impacting’, and 5 means ‘extremely impacting’, how much of an impact facial acne and [shoulders, chest, bust, or back] acne has overall on your quality of life. MODERATOR PLEASE REFER AND WRITE THE ANSWER ON THE COMPLETION SHEET 2
26. To what extent do you treat your facial acne differently compared to the acne on your shoulders, chest/bust or back?
- Any difference in the skincare routine?
  - Please describe you daily routine for your acne on the face, and for your acne on your [shoulders, chest, bust, or back]
27. Overall, which aspect of the acne is the most concerning, worrying for you? *SPONTANEOUSLY, THEN ASK:*
- The location? (face, shoulders, chest/bust/back?) Why?
  - The possibility of developing scars in the future?
  - Some specific uncomfortable situations, which ones?
  - What if anything, does having acne on your face and [shoulders, chest, bust, or back] prevent you from doing?
28. What area in your life would you say is the most impacted by acne? *SPONTANEOUS THEN PROBE AND COVER IN DEPTH ALL THE AREAS IMPACTED:*
- Professionally/ at school PLEASE ADAPT ACCORDINGLY? Please explain how.
  - Personally (family, spouses/partners)? Please explain how.
  - Socially (friends, coworkers)? Please explain how.
  - Other? Please explain how.
29. Let’s now rate this impact on a 5-point scale. Please indicate which areas of your life are the most impacted by your acne. Again I will ask you to differentiate your acne on the face from your acne on your [shoulders, chest, bust, or back]. MODERATOR, PLEASE REFER AND COMPLETE THE COMPLETION SHEET 3

30. Could you recall any events where your acne made you uncomfortable or changed the way you would have reacted otherwise? *Cover in-depth*
- What have you learned from this event?
  - How much did this event change the way you act/react ?

#### **IV. WRAP-UP (5 min)**

31. What is the most difficult thing to cope with having acne on the face and on [shoulders, chest, bust, or back]?
- Why?
  - If relevant:* How would you say you are coping with it?
32. What would you like to see change (if anything) about the management of your acne on your face and on [shoulders, chest, bust, or back] ?
33. What would you say to the dermatologists treating acne for people like you to improve their management in the future?
34. Is there anything else you would like to add?

**THANK & CLOSE**



### COMPLETION SHEET 1

Please indicate your satisfaction level of your current acne treatment on a 5-point scale where 1 means '*not at all satisfied*', and 5 means '*extremely satisfied*' .

| Acne on the face – Treatment satisfaction |   |   |   |                     |
|-------------------------------------------|---|---|---|---------------------|
| Not at all satisfied                      |   |   |   | Extremely satisfied |
| 1                                         | 2 | 3 | 4 | 5                   |

| Acne on [shoulders, chest, bust, or back]– Treatment satisfaction |   |   |   |                     |
|-------------------------------------------------------------------|---|---|---|---------------------|
| Not at all satisfied                                              |   |   |   | Extremely satisfied |
| 1                                                                 | 2 | 3 | 4 | 5                   |

## COMPLETION SHEET 2

Please indicate on a 5-point scale where 1 means '*not at all impacting*', and 5 means '*extremely impacting*' how much does the acne impact on your quality of life. Please differentiate acne on you face form acne on your [back, shoulders, chest, bust....]  
Please circle the correct answer.

| Acne                           | IMPACT               |   |   |   |                     |
|--------------------------------|----------------------|---|---|---|---------------------|
|                                | Not at all impacting |   |   |   | Extremely impacting |
| On the face                    | 1                    | 2 | 3 | 4 | 5                   |
| On the _____<br><i>Specify</i> | 1                    | 2 | 3 | 4 | 5                   |

### COMPLETION SHEET 3

Please indicate in the following grid how much each of the areas mentioned is impacted by your acne on the face and by your acne on your [back, shoulders, chest, bust...], using a 5-point scale where 1 means “not at all impacted” and 5 “extremely impacted”.

Feel free to add an area of impact that you consider is missing, I'll add it at the bottom of the grid and you can asse its level of impact.

| Areas of impact                 | Type of acne | Not at all impacted |   |   |   |   | Extremely impacted |
|---------------------------------|--------------|---------------------|---|---|---|---|--------------------|
|                                 |              | 1                   | 2 | 3 | 4 | 5 |                    |
| Family life                     | On the face  | 1                   | 2 | 3 | 4 | 5 |                    |
|                                 | On _____     | 1                   | 2 | 3 | 4 | 5 |                    |
| Social life                     | On the face  | 1                   | 2 | 3 | 4 | 5 |                    |
|                                 | On _____     | 1                   | 2 | 3 | 4 | 5 |                    |
| Mood                            | On the face  | 1                   | 2 | 3 | 4 | 5 |                    |
|                                 | On _____     | 1                   | 2 | 3 | 4 | 5 |                    |
| Self-esteem                     | On the face  | 1                   | 2 | 3 | 4 | 5 |                    |
|                                 | On _____     | 1                   | 2 | 3 | 4 | 5 |                    |
| Type of leisure                 | On the face  | 1                   | 2 | 3 | 4 | 5 |                    |
|                                 | On _____     | 1                   | 2 | 3 | 4 | 5 |                    |
| Type of style clothing/ haircut | On the face  | 1                   | 2 | 3 | 4 | 5 |                    |
|                                 | On _____     | 1                   | 2 | 3 | 4 | 5 |                    |
| Hygiene habits                  | On the face  | 1                   | 2 | 3 | 4 | 5 |                    |
|                                 | On _____     | 1                   | 2 | 3 | 4 | 5 |                    |
| Finances / expenses             | On the face  | 1                   | 2 | 3 | 4 | 5 |                    |
|                                 | On _____     | 1                   | 2 | 3 | 4 | 5 |                    |
| Emotions                        | On the face  | 1                   | 2 | 3 | 4 | 5 |                    |
|                                 | On _____     | 1                   | 2 | 3 | 4 | 5 |                    |
| Work / studies                  | On the face  | 1                   | 2 | 3 | 4 | 5 |                    |
|                                 | On _____     | 1                   | 2 | 3 | 4 | 5 |                    |
| Daily organization              | On the face  | 1                   | 2 | 3 | 4 | 5 |                    |
|                                 | On _____     | 1                   | 2 | 3 | 4 | 5 |                    |
| Sleeping habits                 | On the face  | 1                   | 2 | 3 | 4 | 5 |                    |
|                                 | On _____     | 1                   | 2 | 3 | 4 | 5 |                    |
| Eating habits                   | On the face  | 1                   | 2 | 3 | 4 | 5 |                    |
|                                 | On _____     | 1                   | 2 | 3 | 4 | 5 |                    |

## QUANTITATIVE PATIENT QUESTIONNAIRE

### PART 1: SCREENING CRITERIA

Before we begin, we would like to ask you a few questions to check that your profile matches the profile required for this survey.

#### NEW WEB PAGE

**PROG: DO NOT SHOW**

**S0. COUNTRY**

1. US
2. Canada
3. Brazil
4. Germany
5. France
6. Italy

#### NEW WEB PAGE

**S1. You are...**

*Only one possible answer*

**PROG: SINGLE ANSWER**

1. Male
2. Female

#### NEW WEB PAGE

**S2. What is your date of birth?**

/\_/\_/\_\_\_/\_\_\_/\_\_\_/\_\_\_/  
M M Y Y Y Y

**[MONTH = MIN:1 – MAX:12]**

**[YEAR= MIN: 1900 – MAX: 2019]**

**[PROG: CREATE “AGE\_ADULT” VARIABLE: DATE OF TODAY – S2]  
IF AGE\_ADULT IS LOWER THAN 18 → SCREENOUT**

#### NEW WEB PAGE

**S3. Please specify which is the first letter of your first name.**

/\_/\_/ [OE] LIMIT TO ONE CHARACTER

#### NEW WEB PAGE

**S4. How many children aged between 13 and 18 years old, who are currently living in the household, do you have?**

[\_]\_| children aged between 13 and 18 years old living in the household

**[MIN: 0 – MAX: 20]**

**IF S4=0 AND AGE\_ADULT>40 → SCREENOUT**

**NEW WEB PAGE**

**PROG: SHOW S5 IF S4>0 OTHER GO TO S6**

**S5. Please specify for [SHOW IF S4=1: your child / SHOW IF S4 > 1: each of your children] aged between 13 years and less than 18 years old currently living in the household**

|    |                                                    | <b>S5a. Date of Birth</b><br><b>MONTH: MIN= 1/ MAX = 12</b><br><b>YEAR: MIN = 2001 / MAX = 2006</b><br><b>THE DATE MUST NOT BE AFTER</b><br><b>THE CURRENT DATE</b><br><b>AGE_CHILD MUST BE ≥ 13 YEARS</b><br><b>AGE_CHILD MUST BE &lt; 18 YEARS</b> | <b>S5b. Gender</b><br><b>SINGLE</b><br><b>ANSWER</b> | <b>S5c. First</b><br><b>letter of the</b><br><b>first name of</b><br><b>this child</b><br><b>LIMIT TO</b><br><b>ONE</b><br><b>CHARACTER</b> |
|----|----------------------------------------------------|------------------------------------------------------------------------------------------------------------------------------------------------------------------------------------------------------------------------------------------------------|------------------------------------------------------|---------------------------------------------------------------------------------------------------------------------------------------------|
| 1  | 1 <sup>st</sup> child                              | /__//__//__//<br>M M Y Y Y Y                                                                                                                                                                                                                         | 1. Male<br>2. Female                                 | /__/[OE]                                                                                                                                    |
| 2  | <b>SHOW IF S4 &gt; 1</b><br>2 <sup>nd</sup> child  | /__//__//__//<br>M M Y Y Y Y                                                                                                                                                                                                                         | 1. Male<br>2. Female                                 | /__/[OE]                                                                                                                                    |
| 3  | <b>SHOW IF S4 &gt; 2</b> 3 <sup>rd</sup><br>child  | /__//__//__//<br>M M Y Y Y Y                                                                                                                                                                                                                         | 1. Male<br>2. Female                                 | /__/[OE]                                                                                                                                    |
| 4  | <b>SHOW IF S4 &gt; 3</b> 4 <sup>th</sup><br>child  | /__//__//__//<br>M M Y Y Y Y                                                                                                                                                                                                                         | 1. Male<br>2. Female                                 | /__/[OE]                                                                                                                                    |
| 5  | <b>SHOW IF S4 &gt; 4</b> 5 <sup>th</sup><br>child  | /__//__//__//<br>M M Y Y Y Y                                                                                                                                                                                                                         | 1. Male<br>2. Female                                 | /__/[OE]                                                                                                                                    |
| 6  | <b>SHOW IF S4 &gt; 5</b> 6 <sup>th</sup><br>child  | /__//__//__//<br>M M Y Y Y Y                                                                                                                                                                                                                         | 1. Male<br>2. Female                                 | /__/[OE]                                                                                                                                    |
| 7  | <b>SHOW IF S4 &gt; 6</b> 7 <sup>th</sup><br>child  | /__//__//__//<br>M M Y Y Y Y                                                                                                                                                                                                                         | 1 Male<br>2 Female                                   | /__/[OE]                                                                                                                                    |
| 8  | <b>SHOW IF S4 &gt; 7</b> 8 <sup>th</sup><br>child  | /__//__//__//<br>M M Y Y Y Y                                                                                                                                                                                                                         | 1 Male<br>2 Female                                   | /__/[OE]                                                                                                                                    |
| 9  | <b>SHOW IF S4 &gt; 8</b> 9 <sup>th</sup><br>child  | /__//__//__//<br>M M Y Y Y Y                                                                                                                                                                                                                         | 1. Male<br>2. Female                                 | /__/[OE]                                                                                                                                    |
| 10 | <b>SHOW IF S4 &gt; 9</b><br>10 <sup>th</sup> child | /__//__//__//<br>M M Y Y Y Y                                                                                                                                                                                                                         | 1. Male<br>2. Female                                 | /__/[OE]                                                                                                                                    |
| 11 | ...                                                |                                                                                                                                                                                                                                                      |                                                      |                                                                                                                                             |

**CREATE A HIDDEN VARIABLE FOR EACH CHILD**

**AGE\_CHILD = DATE OF TODAY -S5.a**

NEW WEB PAGE

**S6. Please select the region you live in.**

*Only one answer possible*

**SINGLE ANSWER**

**PROG: SHOW THE REGIONS IN ALPHABETIC ORDER**

|    | <b>US S0=1</b>   |
|----|------------------|
|    | <b>Northeast</b> |
| 1  | Connecticut      |
| 2  | Maine            |
| 3  | Massachusetts    |
| 4  | New Hampshire    |
| 5  | New Jersey       |
| 6  | New York         |
| 7  | Pennsylvania     |
| 8  | Rhode Island     |
| 9  | Vermont          |
|    | <b>Midwest</b>   |
| 10 | Illinois         |
| 11 | Indiana          |
| 12 | Iowa             |
| 13 | Kansas           |
| 14 | Michigan         |
| 15 | Minnesota        |
| 16 | Missouri         |
| 17 | Nebraska         |
| 18 | North Dakota     |
| 19 | Ohio             |
| 20 | South Dakota     |
| 21 | Wisconsin        |
|    | <b>South</b>     |
| 22 | Alabama          |
| 23 | Arkansas         |
| 24 | Delaware         |
| 25 | DC               |
| 26 | Florida          |
| 27 | Georgia          |
| 28 | Kentucky         |
| 29 | Louisiana        |
| 30 | Maryland         |
| 31 | Mississippi      |
| 32 | North Carolina   |
| 33 | Oklahoma         |
| 34 | South Carolina   |
| 35 | Tennessee        |

|    |               |
|----|---------------|
| 36 | Texas         |
| 37 | Virginia      |
| 38 | West Virginia |
|    | <b>West</b>   |
| 39 | Alaska        |
| 40 | Arizona       |
| 41 | California    |
| 42 | Colorado      |
| 43 | Hawaii        |
| 44 | Idaho         |
| 45 | Montana       |
| 46 | Nevada        |
| 47 | New Mexico    |
| 48 | Oregon        |
| 49 | Utah          |
| 50 | Washington    |
| 51 | Wyoming       |

|    |                                  |
|----|----------------------------------|
|    | <b>CANADA S0=2</b>               |
|    | <b>Atlantic</b>                  |
| 1  | <i>Newfoundland and Labrador</i> |
| 2  | <i>New Brunswick</i>             |
| 3  | <i>Nova Scotia</i>               |
| 4  | <i>Prince Edward Island</i>      |
|    | <b>Prairies</b>                  |
| 5  | <i>Manitoba</i>                  |
| 6  | <i>Saskatchewan</i>              |
| 7  | <i>Alberta</i>                   |
|    | <b>Central</b>                   |
| 8  | <i>Quebec</i>                    |
| 9  | <i>Ontario</i>                   |
|    | <b>West Coast</b>                |
| 10 | <i>British Columbia</i>          |
|    | <b>North</b>                     |
| 11 | <i>Nunavut</i>                   |
| 12 | <i>Northwest Territories</i>     |
| 13 | <i>Yukon Territory</i>           |

|   |                    |
|---|--------------------|
|   | <b>BRAZIL S0=3</b> |
|   | <b>Nord</b>        |
| 1 | Acre (AC)          |
| 2 | Amazonas (AM)      |
| 3 | Amapá (AP)         |
| 4 | Pará (PA)          |

|                 |                          |
|-----------------|--------------------------|
| 5               | Roraima (RR)             |
| 6               | Tocantins (TO)           |
| 7               | Rondônia (RO)            |
| <b>Nord-Est</b> |                          |
| 8               | Bahia (BA)               |
| 9               | Maranhão (MA)            |
| 10              | Ceará (CE)               |
| 11              | Piauí (PI)               |
| 12              | Rio Grande do Norte (RN) |
| 13              | Alagoas (AL)             |
| 14              | Paraíba (PB)             |
| 15              | Sergipe (SE)             |
| 16              | Pernambuco (PE)          |
| <b>Centre</b>   |                          |
| 17              | Mato Grosso do Sul (MS)  |
| 18              | Mato Grosso (MT)         |
| 19              | Distrito Federal         |
| 20              | Goiás (GO)               |
| <b>Sud-Est</b>  |                          |
| 21              | São Paulo (SP)           |
| 22              | Espírito Santo (ES)      |
| 23              | Minas Gerais (MG)        |
| 24              | Rio de Janeiro (RJ)      |
| <b>Sud</b>      |                          |
| 25              | Rio Grande do Sul (RS)   |
| 26              | Paraná (PR)              |
| 27              | Santa Catarina (SC)      |

|                               |                             |
|-------------------------------|-----------------------------|
| <b>GERMANY S0=4</b>           |                             |
| <b>Gebiet I</b>               |                             |
| 1                             | Brême                       |
| 2                             | Hambourg                    |
| 3                             | Basse-Saxe                  |
| 4                             | Schleswig-Holstein          |
| <b>Gebiet II &amp; IIIa</b>   |                             |
| 5                             | Hesse                       |
| 6                             | Rhénanie-du-Nord-Westphalie |
| 7                             | Rhénanie-Palatinat          |
| 8                             | Sarre                       |
| <b>Gebiet IIIb &amp; IV</b>   |                             |
| 9                             | Bade-Wurtemberg             |
| 10                            | Bavière                     |
| <b>Gebiet V, VI &amp; VII</b> |                             |
| 11                            | Berlin                      |
| 12                            | Brandebourg                 |



|    |                                    |
|----|------------------------------------|
| 13 | Mecklembourg-Poméranie-Occidentale |
| 14 | Saxe                               |
| 15 | Saxe-Anhalt                        |
| 16 | Thuringe                           |

|    |                            |
|----|----------------------------|
|    | <b>FRANCE S0=5</b>         |
| 1  | Auvergne-Rhône-Alpes       |
| 2  | Bourgogne-Franche-Comté    |
| 3  | Bretagne                   |
| 4  | Centre-Val de Loire        |
| 5  | Corse                      |
| 6  | Grand Est                  |
| 7  | Hauts-de-France            |
| 8  | Île-de-France              |
| 9  | Normandie                  |
| 10 | Nouvelle-Aquitaine         |
| 11 | Occitanie                  |
| 12 | Pays de la Loire           |
| 13 | Provence-Alpes-Côte d'Azur |

|    |                                            |
|----|--------------------------------------------|
|    | <b>ITALY S0=6</b>                          |
|    | <b>Nord-Ovest</b>                          |
| 1  | <i>Piemonte</i>                            |
| 2  | <i>Valle d'Aosta</i>                       |
| 3  | <i>Liguria</i>                             |
| 4  | <i>Lombardia</i>                           |
|    | <b>Nord-Est</b>                            |
| 5  | <i>Provincia Autonoma di Bolzano/Bozen</i> |
| 6  | <i>Provincia Autonoma di Trento</i>        |
| 7  | <i>Veneto</i>                              |
| 8  | <i>Friuli-Venezia Giulia</i>               |
| 9  | <i>Emilia-Romagna</i>                      |
|    | <b>Centro (IT)</b>                         |
| 10 | <i>Toscana</i>                             |
| 11 | <i>Umbria</i>                              |
| 12 | <i>Marche</i>                              |
| 13 | <i>Lazio</i>                               |
|    | <b>Sud</b>                                 |
| 14 | <i>Abruzzo</i>                             |
| 15 | <i>Molise</i>                              |
| 16 | <i>Campania</i>                            |
| 17 | <i>Puglia</i>                              |
| 18 | <i>Basilicata</i>                          |
| 19 | <i>Calabria</i>                            |
|    | <b>Isole</b>                               |

|    |          |
|----|----------|
| 20 | Sicilia  |
| 21 | Sardegna |

**NEW WEB PAGE**

**S7. Which best describes your current residence?**

*Only one possible answer*

**SINGLE ANSWER**

- 1 Urban (city)
- 2 Suburban
- 3 Rural

**NEW WEB PAGE**

**S8. What is your marital status?**

*Only one answer possible*

**PROG: SINGLE ANSWER**

1. Married / living with partner
2. Single
3. Divorced / separated
4. Widowed

**NEW WEB PAGE**

**S9. What is your current working situation?**

*Only one answer possible*

**PROG: SINGLE ANSWER**

1. Employed
2. Self-employed
3. On sick leave
4. Unemployed
5. Retired
6. Student / Pupil
7. Other

**NEW WEB PAGE**

**S10. What is the highest degree or level of schooling that you have completed?**

*Only one answer possible*

**PROG: SINGLE ANSWER**

**PROG: SHOW FOR THE US**

1. None/Primary School/Secondary School
2. High School
3. Undergraduate
4. Post-graduate
5. Other

**PROG: SHOW FOR CANADA**

|                                      |
|--------------------------------------|
| 1. No certificate, diploma or degree |
| 2. High school diploma               |
| 3. Apprenticeship/trades certificate |
| 4. College diploma                   |
| 5. University below bachelor         |
| 6. Bachelor degree or higher         |

**PROG: SHOW FOR FRANCE, GERMANY AND ITALY**

1. Less than primary, primary and lower secondary education
2. Upper secondary and post-secondary non-tertiary education
3. Tertiary education
4. Other

**PROG: SHOW FOR BRAZIL**

1. Illiterate / Incomplete primary (Illiterate / Up to 3rd grade / Up to 3rd grade 1st grade)
2. Primary School / Incomplete Junior (Up to Grade 4 / Grade 4)
3. Completed High School / Completed High School (Complete Elementary / 1st Grade)
4. High School / Incomplete Superior (Full Secondary / 2nd Grade)
5. Graduated
6. Postgraduate studies
7. Master degree
8. Doctorate degree
9. Other

S11.

**FOR FRANCE, US AND CANADA SHOW:** Approximately how much was your total household income in 2018 from all sources, including wages, salaries, tips, interest, child support, investment income, retirement (including Social Security) and alimony?

**FOR BRAZIL, GERMANY AND ITALY SHOW:** Approximately how much was your total household income last month from all sources, including wages, salaries, tips, interest, child support, investment income, retirement (including Social Security) and alimony?

*Only one answer possible*

**PROG: SINGLE ANSWER**

**PROG : SHOW FOR FRANCE**

1. Moins de 10 000 €
2. De 10 000 à moins de 15 000 €
3. De 15 000 à moins de 30 000 €
4. De 30 000 à moins de 45 000 €
5. De 45 000 à moins de 60 000 €
6. De 60 000 à moins de 75 000 €
7. 75 000 € et plus
8. Je ne souhaite pas répondre

**PROG : SHOW FOR US**

1. Less than \$25,000
2. \$25,000 to less than \$40,000
3. \$40,000 to less than \$50,000
4. \$50,000 to less than \$75,000
5. \$75,000 to less than \$100,000
6. \$100,000 to less than \$150,000
7. \$150,000 or more
8. Prefer not to state

**PROG : SHOW FOR CANADA**

1. Less than \$20,000
2. \$20,000 - \$39,999
3. \$40,000- \$74,999
4. \$75,000 or more
5. Prefer not to state

**PROG : SHOW FOR GERMANY**

1. Bis unter 1.000 Euro
2. 1.000 bis unter 2.000 Euro
3. 2.000 bis unter 3.000 Euro
4. 3.000 bis unter 4.000 Euro
5. 4.000 Euro und mehr
6. Prefer not to state

**PROG : SHOW FOR ITALY**

1. Fino a 1000 €
2. 1.000 € - 1.500 €
3. 1.500 € - 2.000 €
4. 2.000 € - 2.500 €
5. 2.500 € - 3.000 €
6. 3.000 € - 3.500 €
7. 3.500 € - 4.000 €
8. 4.000€ - 5000
9. Oltre 5.000€
10. Non desidero rispondere a questa domanda

**PROG : SHOW FOR BRAZIL**

1. Less than R \$ 500
2. From R \$ 501 to R \$ 1,000
3. From R \$ 1,001 to R \$ 2,000
4. From R \$ 2,001 to R \$ 4,500
5. From R \$ 4,501 to R \$ 10,000
6. More than R \$ 10,000
7. Prefer not to state

## NEW WEB PAGE

**THE FOLLOWING QUESTIONS SHOULD BE ASKED TO THE PANELIST OR ONE OF THE CHILDREN DESCRIBED IN S5 WHICHEVER IS CHOSEN BY THE ALGORITHM BELOW [ALL COUNTRIES]**

- OPTION 1: IF  $S4 = 0$ , SELECT THE PANELIST**
- OPTION 2: IF  $S4 > 0$  AND  $AGE\_ADULT > 40$ , USE THE SELECTION ALGORITHM BELOW ONLY FOR THE CHILDREN DESCRIBED IN S5**
- OPTION 3: IF  $S4 > 0$  AND  $AGE\_ADULT \leq 40$ , USE THE SELECTION ALGORITHM DESCRIBED BELOW FOR PANELIST AND CHILD/CHILDREN DESCRIBED IN S5**

**ALGORITHM (FOR OPTION 2 & 3):**

**OPTION 2: CHOOSE THE CHILD (S5a) WITH THE CLOSEST COMING BIRTHDAY**

**OPTION 3: CHOOSE THE PARENT (S2) OR CHILD (S5a) WITH THE CLOSEST COMING BIRTHDAY**

- IF QUOTA FULL → CHOOSE THE FOLLOWING ONE (THIS ACTION CAN BE REPEATED IF THE NEXT ONE IS ALSO QUOTA FULL)**
- IF THE SELECTION TARGETS TWO INDIVIDUALS WITH THE SAME BIRTH DATE, PLEASE CHOOSE THE ONE WITH THE FIRST LETTER IN THE ALPHABET (S3 and S5c)**
- IF THE SELECTION TARGETS TWO INDIVIDUALS WITH THE SAME BIRTH DATE AND WITH THE SAME FIRST LETTER OF THE ALPHABET, PLEASE CHOOSE ONE OF THEM RANDOMLY**

**CHECK QUOTAS**

**PROG: CREATE THE FOLLOWING VARIABLES FOR THE PERSON SELECTED BY THE ALGORITHM**

**- GENDER\_ALGO: GENDER OF THE RESPONDENT SELECTED**

**- AGE\_ALGO: AGE OF THE RESPONDENT SELECTED**

**- FIRST LETTER\_ALGO: FIRST LETTER OF THE FIRST NAME OF THE RESPONDENT SELECTED**

**PROG: CREATE THE FOLLOWING TARGETS VARIBALES:**

**TARGET 1: THE PANELIST SELECTED**

**TARGET 2: ONE OF THE CHILDREN OF THE PANELIST IS SELECTED**

NEW WEB PAGE

**[SHOW ONLY FOR TARGET 2]** The following questions should be answered by your child born on **[SHOW ANSWER IN S5a]** with **[SHOW ANSWER IN S5c]** as first letter of his/her first name. On the next screen we will present him/her the survey.

*You can, of course, stay with your child but please do not comment or interpret any question to avoid interfering with your child's responses while completing the study questionnaire.*

**S12. Do you agree to pass the control to your child?**

**PROG: SINGLE ANSWER**

1. I agree to pass the control to my child **CONTINUE**
2. I do not agree to pass the control to my child **TERMINATE**

INFORMED CONSENT

**[SHOW ONLY FOR TARGET 2]** You have been selected to participate in this survey. We are asking you to answer some questions of this survey on your own.

Participation in this study is voluntary. You may refuse to participate in this study and this decision will not be held against you in any way. After reading the following, if you still wish to participate, please select, "I agree to participate" in the question below. You will then be taken to the survey. If you do not want to participate, select "I do not agree to participate".

Your answers will be absolutely confidential. No identifying information about you, such as your name or email address, will be revealed to anyone.

At the end of the study, the information you provide will be analyzed together with information from other respondents.

**S13. Do you voluntarily agree to participate in this study? PROG: SINGLE ANSWER**

1. I agree to participate **CONTINUE**
2. I do not agree to participate **TERMINATE**

NEW WEB PAGE

**ASK ALL**

**S14. Here is a list of conditions. Please carefully read the list below and select all the conditions you have ever suffered from. Please select all that apply.**

*Several answers possible.*

**PROG: MULTIPLE ANSWERS**

**PROG: RANDOMIZATION OF ITEMS**

1. Psoriasis
2. Seborrheic dermatitis
3. Diabetes
4. Rosacea
5. Eczema
6. Dry Eye Syndrome
7. Acne
8. Cardiac insufficiency
9. Fungal nail infection
10. HIV
11. Erythema
12. Lupus dermatitis
13. None of these **[EXCLUSIVE]**

**IF CODE 7 IS NOT SELECTED → SHORT COMPLETES AND TERMINATE AFTER S15  
IF 5 OR MORE CODES SELECTED → THANK AND TERMINATE**

NEW WEB PAGE

**S15. Amongst the conditions you have ever suffered from, which of them have been diagnosed by a physician?**

Several answers possible

**PROG: MULTIPLE ANSWERS**

**PROG: SHOW THE LIST OF ITEMS SELECTED IN S14**

**IF CODE 7 FROM S14 IS NOT SELECTED IN S15 → SHORT COMPLETES AND TERMINATE HERE**

**NEW WEB PAGE**

**S16. What is the specialty of the physician who diagnosed your acne?**

*Only one answer possible*

**PROG: SINGLE ANSWER**

1. A dermatologist
2. A general practitioner / Family practitioner
3. A paediatrician
4. A Physician's Assistant (PA) **[PROG: US ONLY]**
5. A Nurse Practitioner (NP) **[PROG: US ONLY]**
6. An Internist
7. Another physician (please specify) **[OPEN ENDED]**
8. None of these

**IF CODE 1 OR 2 OR 3 OR 4 OR 5 OR 6 NOT SELECTED → SHORT COMPLETES**

**NEW WEB PAGE**

**S17. In the past 12 months, which of the following have you seen in relation to your acne?**

*Several answers possible*

**PROG: MULTIPLE ANSWERS**

1. A dermatologist
2. A general practitioner / Family practitioner
3. A paediatrician
4. A Physician's Assistant (PA) **[PROG: US ONLY]**
5. A Nurse Practitioner (NP) **[PROG: US ONLY]**
6. An Internist
7. Another physician (please specify) **[OPEN ENDED]**
8. Another physician (please specify) **[OPEN ENDED]**
9. Another physician (please specify) **[OPEN ENDED]**
10. I have not seen any physician for my acne in the past 12 months **[EXCLUSIVE]**

**IF CODES 1 OR 2 OR 3 OR 4 OR 5 OR 6 ARE NOT SELECTED → SHORT COMPLETES**



NEW WEB PAGE

**PROG: ASK ALL**

**S18A. Have you been prescribed a treatment for your acne in the past 12 months by a physician?**

*Only one answer possible*

**PROG: SINGLE ANSWER**

- 1. Yes
- 2. No **IF CODE 2 SELECTED → SHORT COMPLETES**

NEW WEB PAGE

**PROG: ASK IF S18A=1**

**S18Bis. What type of treatment were you prescribed?**

*Only one answer possible*

**PROG: SINGLE ANSWER**

- 1. I was prescribed a **topical** treatment(s) such as creams or ointments that you apply directly to your acne
- 2. I was prescribed an **oral** treatment(s) such as pills that you swallow
- 3. I was prescribed **both** a topical and an oral treatments(s)

NEW WEB PAGE

**PROG: ASK IF S18A=1**

**S18. Amongst the treatments below, which ones have you taken in the past 12 months that were prescribed by a physician for your acne?**

*Several answers possible*

**PROG: MULTIPLE ANSWERS PER COLUMN**

**FOR EACH COLUMN SHOW A DROP-DOWN LIST WITH THE TREATMENTS FROM THE TREATMENT LIST AND ALSO ADD AN OPTION OTHER**

**IF THE RESPONDENT SELECTS THE OTHER OPTION (AND ONLY THEN) SHOW AN OE FIELD WHERE THEY CAN TYPE THEIR ANSWER. WHILE THEY TYPE AUTOMATICALLY IDENTIFY ALREADY EXISTING TREATMENTS FROM THE PREDEFINED LIST**

**IF THE RESPONDENT FILLS IN THE OTHER FIELD SHOW A NEW OE FIELD IF THEY WISH TO ADD ANOTHER TREATMENT**

**ALLOW THE RESPONDENT TO CONTINUE (I.E. DO NOT QUALIFY THEM AS SHORT COMPLETE) EVEN IF THEY HAVE ONLY ENTERED THEMSELVES ANOTHER TREATMENT NOT FROM THE PREDEFINED LIST**

**SEND THE KANTAR HEALTH TEAM A DAILY EXPORT WITH ALL OTHER TREATMENTS FILLED IN BY RESPONDENTS**

|   |                              | <b>S18.1 Topical treatments<br/>SHOW IF S18B=1 OR<br/>3</b> | <b>S18.2 Oral treatments<br/>SHOW IF S18B=2 OR<br/>3</b> |
|---|------------------------------|-------------------------------------------------------------|----------------------------------------------------------|
| 1 | Treatment 1 (please specify) | [OPEN ENDED]                                                | [OPEN ENDED]                                             |
| 2 | Treatment 2 (please specify) | [OPEN ENDED]                                                | [OPEN ENDED]                                             |
| 3 | Treatment 3 (please specify) | [OPEN ENDED]                                                | [OPEN ENDED]                                             |
| 4 | Treatment 4 (please specify) | [OPEN ENDED]                                                | [OPEN ENDED]                                             |
| 5 | Treatment 5 (please specify) | [OPEN ENDED]                                                | [OPEN ENDED]                                             |

|   |       |  |  |
|---|-------|--|--|
| 6 | Other |  |  |
|---|-------|--|--|

**NEW WEB PAGE**

**ASK IF GENDER\_ALGO =2**

**S18.B In the past 12 months, have you taken the birth control pill or another form of hormonal treatment that was prescribed to you by your doctor?**

*Only one answer possible*

**PROG: SINGLE ANSWER**

4. Yes
5. No
6. I do not know

**NEW WEB PAGE**

**S19. Any time in the past 12 months, which part(s) of your body has/have been affected with acne?**

*Several answers possible*

**PROG: MULTIPLE ANSWERS**

1. Face
2. Shoulders
3. Chest
4. Back
5. Arms, not including shoulders
6. Neck
7. Other, please specify: **[OPEN ENDED]**

**IF CODE 1 IS NOT SELECTED → SHORT COMPLETES**

**IF S19 = 1 AND (2 AND/OR 5 AND/OR 7) AND NOT (3 AND/OR 4) → SHORT COMPLETES**

**PROG: CREATE 2 GROUPS**

**1. FACIAL GROUP = FACIAL ONLY: S19 = 1 AND (NOT: 2 OR 3 OR 4 OR 5 OR 7)**

**2. TRUNCAL GROUP = FACIAL + TRUNCAL: S19 = 1 AND (3 OR 4)**

**NEW WEB PAGE**

**ASK S20 IF S19 = 1**

**S20. Using the table and pictures below please rate your worst ever acne on your face within the past 12 months?**

**PROG: SINGLE ANSWER**

| Code | Grade | Description                                                                                                                                                                                                                      | SHOW IF<br>GENDER_ALGO<br>=2                                                         | SHOW IF<br>GENDER_ALGO<br>=1                                                          |
|------|-------|----------------------------------------------------------------------------------------------------------------------------------------------------------------------------------------------------------------------------------|--------------------------------------------------------------------------------------|---------------------------------------------------------------------------------------|
| 1    | 0     | No active lesions. Residual pigmentation (brown or dark spots) and redness may be seen                                                                                                                                           |    |    |
| 2    | 1     | Almost no acne lesions. A few scattered blackheads or whiteheads (open or closed comedones respectively) and very few acne bumps (papules)                                                                                       |    |    |
| 3    | 2     | Easily recognizable: less than half of the face is involved. A few blackheads or whiteheads (open or closed comedones respectively) and a few red acne bumps (papules) and zits (pustules)                                       |   |   |
| 4    | 3     | More than half of the face is involved. Many red acne bumps (papules) and zits (pustules), many blackheads and whiteheads (open or closed comedones respectively). One larger deeper cystic acne lesion (nodule) may be present. |  |  |
| 5    | 4     | Entire face is involved. Covered with many red acne bumps (papules) and zits (pustules), black or whiteheads (open or closed comedones respectively) and rare deeper cystic acne lesions (nodules).                              |  |  |
| 6    | 5     | Highly inflammatory acne. Covering the face with presence of larger deeper cystic acne lesions (nodules).                                                                                                                        | Even worse than grade 4                                                              | Even worse than grade 4                                                               |

**IF CODE 1 OR 2 OR 3 ARE SELECTED → SHORT COMPLETES**

**NEW WEB PAGE**

**ASK S21 IF S19 = 3**

**S21. Using the table and pictures below please rate your worst ever acne in your chest within the past 12 months?**

**PROG: SINGLE ANSWER**

| Code | Grade | Description                                                                                                                                                                                                                       |                                                                                       |
|------|-------|-----------------------------------------------------------------------------------------------------------------------------------------------------------------------------------------------------------------------------------|---------------------------------------------------------------------------------------|
| 1    | 0     | No active lesions. Residual pigmentation (brown or dark spots) and redness may be seen                                                                                                                                            |    |
| 2    | 1     | Almost no acne lesions. A few scattered blackheads or whiteheads (open or closed comedones respectively) and very few acne bumps (papules)                                                                                        |    |
| 3    | 2     | Easily recognizable: less than half of the chest is involved. A few blackheads or whiteheads (open or closed comedones respectively) and a few red acne bumps (papules) and zits (pustules)                                       |   |
| 4    | 3     | More than half of the chest is involved. Many red acne bumps (papules) and zits (pustules), many blackheads and whiteheads (open or closed comedones respectively). One larger deeper cystic acne lesion (nodule) may be present. |  |
| 5    | 4     | Entire chest is involved. Covered with many red acne bumps (papules) and zits (pustules), black or whiteheads (open or closed comedones respectively) and rare deeper cystic acne lesions (nodules).                              |  |
| 6    | 5     | Highly inflammatory acne. Covering the chest with presence of larger deeper cystic acne lesions (nodules).                                                                                                                        | Even worse than grade 4                                                               |

**NEW WEB PAGE**

**ASK S22 IF S19 = 4**

**S22. Using the table and pictures below please rate your worst ever acne in your back within the past 12 months?**

**PROG: SINGLE ANSWER**

| Code | Grade | Description                                                                                                                                                                                                                      |                                                                                       |
|------|-------|----------------------------------------------------------------------------------------------------------------------------------------------------------------------------------------------------------------------------------|---------------------------------------------------------------------------------------|
| 1    | 0     | No active lesions. Residual pigmentation (brown or dark spots) and redness may be seen                                                                                                                                           |    |
| 2    | 1     | Almost no acne lesions. A few scattered blackheads or whiteheads (open or closed comedones respectively) and very few acne bumps (papules)                                                                                       |    |
| 3    | 2     | Easily recognizable: less than half of the back is involved. A few blackheads or whiteheads (open or closed comedones respectively) and a few red acne bumps (papules) and zits (pustules)                                       |   |
| 4    | 3     | More than half of the back is involved. Many red acne bumps (papules) and zits (pustules), many blackheads and whiteheads (open or closed comedones respectively). One larger deeper cystic acne lesion (nodule) may be present. |  |
| 5    | 4     | Entire back is involved. Covered with many red acne bumps (papules) and zits (pustules), black or whiteheads (open or closed comedones respectively) and rare deeper cystic acne lesions (nodules).                              |  |
| 6    | 5     | Highly inflammatory acne. Covering the back with presence of larger deeper cystic acne lesions (nodules).                                                                                                                        | Even worse than grade 4<br>4                                                          |

**IF TRUNCAL GROUP AND (S19=3 AND S19=4) AND (CODE 1 OR 2 OR 3 IN S21 AND (CODE 1 OR 2 OR 3 IN S22) → SHORT COMPLETES**

**IF TRUNCAL GROUP AND (S19=3 AND S19 =NOT 4) AND (CODE 1 OR 2 OR 3 IN S21 IS SELECTED) → SHORT COMPLETES**

**IF TRUNCAL GROUP AND (S19=4 AND S19=NOT 3) AND (CODE 1 OR 2 OR 3 IN S22) → SHORT COMPLETES**

**IF FACIAL GROUP AND S19 = 1 AND (NOT: 2 OR 3 OR 4 OR 5) AND (CODE 1 OR 2 OR 3 S20)→ SHORT COMPLETES**

**NEW WEB PAGE**

**ASK S23 IF S19 = 1**

**S23. Using the table and pictures below please rate your current acne on your face?  
**PROG: SINGLE ANSWER****

| Code | Grade | Description                                                                                                                                                                                                                      | SHOW IF<br>GENDER_ALGO<br>=2                                                         | SHOW IF<br>GENDER_ALGO<br>=1                                                          |
|------|-------|----------------------------------------------------------------------------------------------------------------------------------------------------------------------------------------------------------------------------------|--------------------------------------------------------------------------------------|---------------------------------------------------------------------------------------|
| 1    | 0     | No active lesions. Residual pigmentation (brown or dark spots) and redness may be seen                                                                                                                                           |    |    |
| 2    | 1     | Almost no acne lesions. A few scattered blackheads or whiteheads (open or closed comedones respectively) and very few acne bumps (papules)                                                                                       |    |    |
| 3    | 2     | Easily recognizable: less than half of the face is involved. A few blackheads or whiteheads (open or closed comedones respectively) and a few red acne bumps (papules) and zits (pustules)                                       |   |   |
| 4    | 3     | More than half of the face is involved. Many red acne bumps (papules) and zits (pustules), many blackheads and whiteheads (open or closed comedones respectively). One larger deeper cystic acne lesion (nodule) may be present. |  |  |
| 5    | 4     | Entire face is involved. Covered with many red acne bumps (papules) and zits (pustules), black or whiteheads (open or closed comedones respectively) and rare deeper cystic acne lesions (nodules).                              |  |  |
| 6    | 5     | Highly inflammatory acne. Covering the face with presence of larger deeper cystic acne lesions (nodules).                                                                                                                        | Even worse than grade 4                                                              | Even worse than grade 4                                                               |

**IF CODE 1 OR 2 ARE SELECTED → SHORT COMPLETES**

**NEW WEB PAGE**

**ASK S24 IF S19 = 3**

**S24. Using the table and pictures below please rate your current acne in your chest?  
**PROG: SINGLE ANSWER****

| Code | Grade | Description |
|------|-------|-------------|
|      |       |             |

|   |   |                                                                                                                                                                                                                                   |                                                                                       |
|---|---|-----------------------------------------------------------------------------------------------------------------------------------------------------------------------------------------------------------------------------------|---------------------------------------------------------------------------------------|
| 1 | 0 | No active lesions. Residual pigmentation (brown or dark spots) and redness may be seen                                                                                                                                            |    |
| 2 | 1 | Almost no acne lesions. A few scattered blackheads or whiteheads (open or closed comedones respectively) and very few acne bumps (papules)                                                                                        |    |
| 3 | 2 | Easily recognizable: less than half of the chest is involved. A few blackheads or whiteheads (open or closed comedones respectively) and a few red acne bumps (papules) and zits (pustules)                                       |    |
| 4 | 3 | More than half of the chest is involved. Many red acne bumps (papules) and zits (pustules), many blackheads and whiteheads (open or closed comedones respectively). One larger deeper cystic acne lesion (nodule) may be present. |   |
| 5 | 4 | Entire chest is involved. Covered with many red acne bumps (papules) and zits (pustules), black or whiteheads (open or closed comedones respectively) and rare deeper cystic acne lesions (nodules).                              |  |
| 6 | 5 | Highly inflammatory acne. Covering the chest with presence of larger deeper cystic acne lesions (nodules).                                                                                                                        | Even worse than grade 4                                                               |

**NEW WEB PAGE**

**ASK S25 IF S19 = 4**

**S25. Using the table and pictures below please rate your current acne in your back?**

**PROG: SINGLE ANSWER**

| Code | Grade | Description                                                                                                                                                                                                                      |                                                                                       |
|------|-------|----------------------------------------------------------------------------------------------------------------------------------------------------------------------------------------------------------------------------------|---------------------------------------------------------------------------------------|
| 1    | 0     | No active lesions. Residual pigmentation (brown or dark spots) and redness may be seen                                                                                                                                           |    |
| 2    | 1     | Almost no acne lesions. A few scattered blackheads or whiteheads (open or closed comedones respectively) and very few acne bumps (papules)                                                                                       |    |
| 3    | 2     | Easily recognizable: less than half of the back is involved. A few blackheads or whiteheads (open or closed comedones respectively) and a few red acne bumps (papules) and zits (pustules)                                       |   |
| 4    | 3     | More than half of the back is involved. Many red acne bumps (papules) and zits (pustules), many blackheads and whiteheads (open or closed comedones respectively). One larger deeper cystic acne lesion (nodule) may be present. |  |
| 5    | 4     | Entire back is involved. Covered with many red acne bumps (papules) and zits (pustules), black or whiteheads (open or closed comedones respectively) and rare deeper cystic acne lesions (nodules).                              |  |
| 6    | 5     | Highly inflammatory acne. Covering the back with presence of larger deeper cystic acne lesions (nodules).                                                                                                                        | Even worse than grade 4<br>4                                                          |

**IF TRUNCAL GROUP AND (S19=3 AND S19=4) AND (CODE 1 OR 2 IN S24) AND (CODE 1 OR 2 IN S25) → SHORT COMPLETES**

**IF TRUNCAL GROUP AND (S19=3 AND S19=NOT 4) AND (CODE 1 OR 2 IN S24 IS SELECTED) → SHORT COMPLETES**

**IF TRUNCAL GROUP AND (S19=4 AND S19=NOT 3) AND (CODE 1 OR 2 IN S25) → SHORT COMPLETES**

**IF FACIAL GROUP AND S19 = 1 AND (NOT: 2 OR 3 OR 4 OR 5) AND (CODE 1 OR 2 S23) → SHORT COMPLETES**



**PROG: CHECK THE QUOTAS (50% OF FACIAL AND 50% OF TRUNCAL)  
IF QUOTA FULL AT THIS POINT → SHORT COMPLETES**

**PROG: THE SHORT COMPLETES MUST TERMINATE HERE**

**PART 2: COMORBIDITIES AND SKIN CARE**

**NEW WEB PAGE**

**Q1. On average, how long do you spend on your skin care routine each day in total?**

*By skin care routine we mean any of the following: washing your face [SHOW ONLY FOR TRUNCAL GROUP: [IF S19 = 3 SHOW: chest / IF S19 = 4 SHOW: /back] or use of any cosmetic product (moisturizer, exfoliating products, make-up remover, dark spots correctors, anti-aging products, sunscreen, anti-redness/calming products, anti-acne/blemish products, foundation/powder or any other type of make-up etc.)*

*If you don't have a daily skin care routine, please enter 0.*

|                                                            |                                                                                                                                          |
|------------------------------------------------------------|------------------------------------------------------------------------------------------------------------------------------------------|
| <b>Q1.1</b> Skin care routine on your face                 | <b>[SHOW ONLY FOR TRUNCAL GROUP]</b><br><b>Q1.2</b> Skin care routine in your<br><b>[IF S19 = 3 SHOW: chest / IF S19 = 4 SHOW: back]</b> |
| Duration in minutes: /_/_/_/_/<br><b>MIN: 0 – MAX: 999</b> | Duration in minutes: /_/_/_/_/<br><b>MIN: 0 – MAX: 999</b>                                                                               |

**PROG: IF BOTH Q1.1 AND Q1.2= 0 GO DIRECTLY TO Q4**

**NEW WEB PAGE**

**Q2. Would you say you have a specific skin care routine due to your acne ( i.e. a certain skin care routine which is unique for your acne including any of the following: cleansers, moisturizing cream, masks, exfoliant creams, soft peelings, make up, etc that you use for your acne)?**

*Only one answer possible*

**PROG: SINGLE ANSWER**

|                                                                                                                                          |                                                                                                                                                       |
|------------------------------------------------------------------------------------------------------------------------------------------|-------------------------------------------------------------------------------------------------------------------------------------------------------|
| <b>[SHOW ONLY IF Q1.1&gt;0]</b><br><b>Q2.1</b> Acne on your face                                                                         | <b>[SHOW ONLY FOR TRUNCAL GROUP]</b><br><b>[SHOW ONLY IF Q1.2&gt;0]</b><br><b>Q2.2</b> Acne on your [IF S19 = 3 SHOW: chest / IF S19 = 4 SHOW: /back] |
| 1. Yes                                                                                                                                   | 1. Yes                                                                                                                                                |
| 2. No                                                                                                                                    | 2. No                                                                                                                                                 |
| <b>[SHOW IF Q2.1=1]</b><br><b>Q2.1.1</b> Duration of <u>specific</u> skin care in minutes per day: /_/_/_/_/<br><b>MIN: 0 – MAX: 999</b> | <b>[SHOW IF Q2.2=1]</b><br><b>Q2.2.1</b> Duration of <u>specific</u> skin care in minutes per day: /_/_/_/_/<br><b>MIN: 0 – MAX: 999</b>              |

**NEW WEB PAGE**

**ASK Q3 IF CODE 1 WAS SELECTED IN Q2.1 AND/OR Q2.2**

**Q3. Please, read the following statements and indicate to what extent you agree or disagree with each of them when it comes to your specific skin care routine regarding acne**

*Only one possible answer*

**PROG: SINGLE ANSWER**

**PROG: RATE FROM:**

1. Strongly disagree
2. Disagree
3. Somewhat disagree
4. Somewhat agree
5. Agree
6. Strongly agree

**PROG: RANDOMIZATION OF ITEMS**

|    | Your <b>acne</b> skin care routine is... | <b>[SHOW ONLY IF Q2.1=1]<br/>Q3.1 Acne on your face</b> | <b>[SHOW ONLY IF Q2.2=1]<br/>[SHOW ONLY FOR TRUNCAL GROUP]<br/>Q3.2 Acne on your [IF S19 = 3 SHOW: chest / IF S19 = 4 SHOW: back]</b> |
|----|------------------------------------------|---------------------------------------------------------|---------------------------------------------------------------------------------------------------------------------------------------|
| 1  | Easy/Straightforward                     |                                                         |                                                                                                                                       |
| 2  | Boring                                   |                                                         |                                                                                                                                       |
| 3  | Time-consuming                           |                                                         |                                                                                                                                       |
| 4  | Complex/difficult                        |                                                         |                                                                                                                                       |
| 5  | Constraining/Restricting                 |                                                         |                                                                                                                                       |
| 6  | Messy                                    |                                                         |                                                                                                                                       |
| 7  | Mandatory                                |                                                         |                                                                                                                                       |
| 8  | Soothing                                 |                                                         |                                                                                                                                       |
| 9  | Needs to be adapted from time to time    |                                                         |                                                                                                                                       |
| 10 | Costly                                   |                                                         |                                                                                                                                       |
| 11 | It has side effects                      |                                                         |                                                                                                                                       |
| 12 | Frustrating                              |                                                         |                                                                                                                                       |
| 13 | Manageable                               |                                                         |                                                                                                                                       |

**NEW WEB PAGE**

**Q4. Has a member of your immediate family ever had acne? Your immediate family refers to your parents, siblings [SHOW ONLY FOR TARGET 1: and children] only, not your spouse or partner.**

*Several answers possible*

**PROG: MULTIPLE ANSWERS**

1. Yes, your mother
2. Yes, your father
3. Yes, your sister
4. Yes, your brother
5. Yes, your children **[SHOW ONLY FOR TARGET 1]**
6. Yes, another member of your immediate family
7. No **[EXCLUSIVE]**
8. I do not know **[EXCLUSIVE]**

### PART 3: DISEASE CHARACTERISTICS

#### PROG: SHOW TO ALL

In the following parts, we will ask you some questions in relation to the acne on your face [**PROG: SHOW FOR TRUNCAL GROUP:** and on your [**IF S19 = 3 SHOW:** chest / **IF S19 = 4 SHOW:** /back]. Please do not consider acne scars when answering this section.

**PROG: SHOW FOR TRUNCAL GROUP** Some questions will relate to your acne, meaning that, when answering any of these questions you should consider your acne anywhere in your body.

#### PROG: FOR TRUNCAL GROUP, PLEASE RANDOMIZE BLOCK 1 AND BLOCK 2

NEW WEB PAGE

START OF BLOCK1 (Facial acne questions)

#### SHOW FOR ALL

Next, we will ask you about your symptoms of your **facial acne only**. Please do not consider acne scars when answering questions in this section.

NEW WEB PAGE

**Q5. Approximately, at what age did you first notice your facial acne?**

/\_/\_/ years old

**RANGE: 0 – AGE\_ALGO**

1. I do not remember

NEW WEB PAGE

**Q6. What did you first notice about your facial acne? Please select from the list below of acne symptoms/signs those that you first noticed in your face**

*Several answers possible*

**PROG: MULTIPLE ANSWERS**

1. Blackheads (open plugged pores/comedones) and/or whiteheads (closed plugged pores)  
**THIS SYMPTOM TEXT SHOULD APPEAR ON A SINGLE LINE**

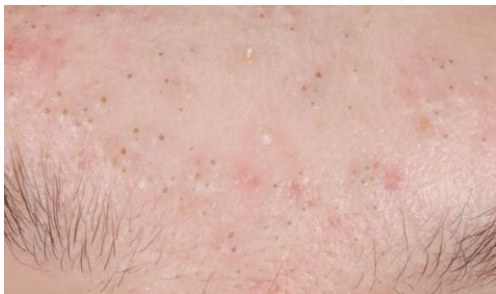

2. Papules (red, tender, raised bumps that may be small or large)

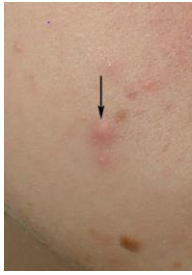

3. Pimples or pustules (red, inflamed, with a white head, or papules with pus at their tips)

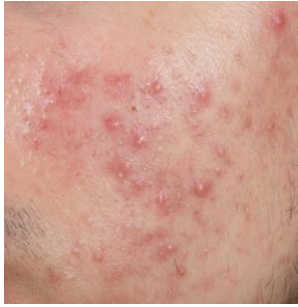

4. Nodules (Large, solid, painful lumps beneath the surface of the skin)

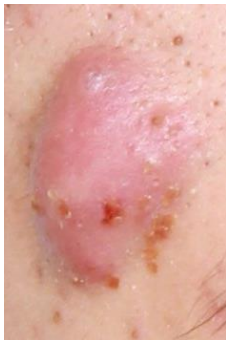

5. Cystic lesions (painful, pus-filled lumps beneath the surface of the skin)

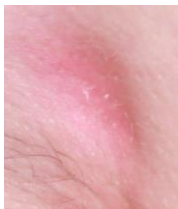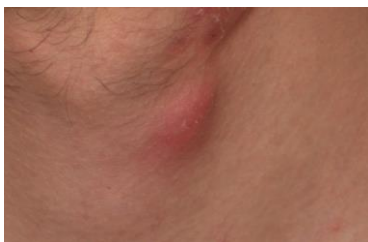

6. Post-inflammatory hyperpigmentation: dark, discoloured spots left behind after an acne blemish has healed
7. Pain in any of the type of lesions listed above
8. I don't remember

**NEW WEB PAGE**

**Q7. Could you estimate the time between the appearance of your first symptoms/signs of facial acne ( i.e. when you first noticed your facial acne) and the first time you consulted a physician about it? You can answer the questions in days, OR months OR years.**

**PROG: ONLY ONE ANSWER BETWEEN DAYS, MONTHS OR YEARS**

Time between first symptoms and physician consultation:

/\_/\_/\_/\_/ days **[EXCLUSIVE] [MIN:1- MAX:999]**

/\_/\_/\_/\_/ months **[EXCLUSIVE] [MIN:1- MAX:999]**

/\_/\_/\_/\_/ years **[EXCLUSIVE] [MIN:1 - MAX: AGE\_ALGO-Q5]**

1. I do not remember

**NEW WEB PAGE**

**Q8. At what age were you diagnosed with facial acne by a physician?**

/\_/\_/ years old

**[MIN: Q5 – MAX: AGE\_ALGO]**

1. I do not remember

**NEW WEB PAGE**

**Q9. Which symptoms / signs of facial acne have you ever experienced?**

Several answers possible

**PROG: MULTIPLE ANSWERS**

**SHOW AN ERROR MESSAGE IF SYMPTOMS SELECTED IN Q6 ARE NOT SELECTED IN Q9**

**NEW WEB PAGE**

**Q10. Please specify which area(s) of your face have ever been affected by acne.**

Several answers possible

**PROG: MULTIPLE ANSWERS**

1. Forehead (yellow)
2. Right temple (orange)
3. Left temple (purple)
4. Right cheek (green)
5. Left cheek (red)
6. Mandibular areas (turquoise)
7. Nose (grey)
8. Eyes
9. Other (please specify) **[OPEN ENDED]**

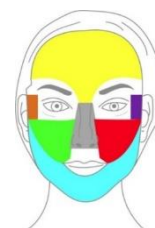

**NEW WEB PAGE**

**Q11. In general, would you say that your symptoms/signs of acne on your face... Please do not consider acne scars when answering this question**

Only one answer possible

**PROG: SINGLE ANSWER**

1. Appear only when you have an acne breakout/flare
2. Are nearly always present and worsen when you have an acne breakout/flare
3. Are nearly always present and you do not experience breakout/flare (i.e. are almost consistently the same over time)

**NEW WEB PAGE**

**PROG: SHOW FOR EVERY RESPONSE TICKED IN Q9**

**Q12. In the past 12 months, have you experienced [INSERT RESPONSE IN Q9] on your face?  
SHOW PHOTO FROM Q6 NEXT TO EACH SYMPTOM**

*Only one answer possible*

**PROG: SINGLE ANSWER**

1. Never
2. Episodically
3. Only during flares/breakouts **[SHOW ONLY Q11 = 1 OR 2]**
4. Permanently

**PROG: CREATE A VARIABLE: SYMPTOMS ON THE FACE THE PAST 12 MONTHS  
WITH EACH SYMPTOM TICKED IN Q9 AND Q12 DIFFERENT FROM 1**

**NEW WEB PAGE**

**Q13. In the past 12 months, please specify which area(s) of your face have been affected by your acne.**

*Several answers possible*

**PROG: MULTIPLE ANSWERS**

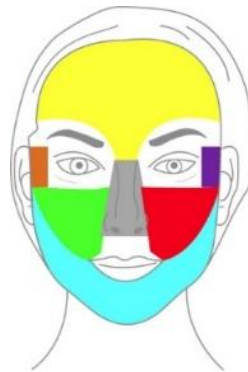

NEW WEB PAGE

**PROG: SHOW FOR EVERY RESPONSE FROM THE VARIABLE SYMPTOMS ON THE FACE IN THE PAST 12 MONTHS**

**Q14.** On a scale from 0 to 10, how would you describe each of the symptoms/signs of facial acne you have experienced in the last 12 months? Please do not consider acne scars when answering this question

**SCALE FROM 0 TO 10**

**EACH ITEMS FROM THE VARIABLE SYMPTOMS ON THE FACE IN THE PAST 12 MONTHS**

**SHOW PHOTO FROM Q6 NEXT TO EACH SYMPTOM**

Not manageable at all

Extremely easy to manage

0-----1-----2-----3-----4-----5-----6-----7-----8-----9-----10

NEW WEB PAGE

**Q15.** In general, would you say that your facial acne has been under control in the past 12 months?

Please do not consider acne scars when answering this question

*Only one possible answer*

**PROG: SINGLE ANSWER**

1. Yes, totally
2. Yes partially
3. Not at all

NEW WEB PAGE

**Q16.** What activities/behaviours did/do you avoid because of your facial acne?

Please think of all changes / adaptations you may have made since the diagnosis of your facial acne.

*Several answers possible*

**PROG: MULTIPLE ANSWERS**

**PROG: RANDOMIZATION OF ITEMS**

**You avoid/try avoiding ...**

1. Going to the swimming pool, beach or sauna
2. Going in public without make-up
3. Video chatting
4. Having your photo taken
5. Joining and/or staying on social media
6. Eating/drinking certain foods/beverages
7. Exposing yourself to the sun
8. Doing physical exercise, sport
9. Going out with people / doing social activities
10. Dating or having romantic/intimate relationships
11. Visiting relatives
12. Adopting a given hairstyle that may makes your acne more visible
13. Travelling
14. Participating in certain extracurricular activities at school, university, etc
15. Shopping
16. Choosing a given career path
17. Shaving or not shaving **[ASK ONLY IF GENDER\_ALGO=1]**
18. Wearing clothes that make your acne scars more visible
19. Applying to job positions that require visual public contact **[ASK ONLY TO TARGET 1]**
20. Others (please specify) **OPEN ENDED**
21. You never avoid any activities/behaviours **[EXCLUSIVE]**

NEW WEB PAGE



**Q17. How much do you adjust your daily activities or behaviour because of facial acne?**

**PROG: USE GRID MATRIX NUMBERS TEXT OPTION**

**SCALE FROM 0 TO 10**

0-----1-----2-----3-----4-----5-----6-----7-----8-----9-----10

|                                                                                           |  |                                                                                                                 |
|-------------------------------------------------------------------------------------------|--|-----------------------------------------------------------------------------------------------------------------|
| 0=You do not adjust your daily activities or behaviour because of your <u>facial acne</u> |  | 10=You <del>do not</del> extremely adjust your daily activities or behaviour because of your <u>facial acne</u> |
|-------------------------------------------------------------------------------------------|--|-----------------------------------------------------------------------------------------------------------------|

**END OF BLOCK1 (Facial questions)**

NEW WEB PAGE

START OF BLOCK 2 (Truncal group questions)

**PROG: SHOW FOR TRUNCAL GROUP**

In the following section we will ask you some questions in relation to the acne on your **[IF S19 = 3 SHOW: chest / IF S19 = 4 SHOW: back]** only.

Please do not consider acne scars when answering questions in this section.

NEW WEB PAGE

**Q18.** At what age did you first notice acne on your **[IF S19 = 3 SHOW: chest / IF S19 = 4 SHOW: back]**?

/\_/\_/ years old

**RANGE: 0 – AGE\_ALGO**

1. I do not remember

NEW WEB PAGE

**Q19.** What were the first symptoms / signs of your acne on your **[IF S19 = 3 SHOW: chest / IF S19 = 4 SHOW: back]**?

*Several answers possible*

**PROG: MULTIPLE ANSWERS**

**PROG: SHOW THE SAME LIST OF ANSWER AS Q6 WITH PHOTOS INCLUDED**

99 I do not know

NEW WEB PAGE

**Q20.** Have you ever talked to a physician about your acne on your **[IF S19 = 3 SHOW: chest / IF S19 = 4 SHOW: back]**?

*Only one answer possible*

**PROG: SINGLE ANSWER**

1. Yes
2. No

NEW WEB PAGE

**ASK Q21 IF Q20 = 1**

**Q21.** Who initiated the first conversation with a physician about your acne on your **[IF S19 = 3 SHOW: chest / IF S19 = 4 SHOW: back]**?

*Only one answer possible*

**PROG: SINGLE ANSWER**

1. Yourself. You were the first one to tell the physician that you had truncal acne
2. Your parents were first to tell the physician about my truncal acne
3. The physician was first to ask if you had truncal acne
4. Other, please specify **[OPEN ENDED]**

NEW WEB PAGE

**ASK Q22 IF Q20 = 1**

**Q22.** Could you estimate the time between the appearance of your first symptoms/signs of acne on your **[IF S19 = 3 SHOW: chest / IF S19 = 4 SHOW: back]** and the first time you talked to / consulted a physician about it? You can answer by using the following time units: days, weeks or years.

**PROG: ONLY ONE ANSWER BETWEEN DAYS, MONTHS OR YEARS**

Time between first symptoms and physician consultation:

/\_/\_/\_/\_/ days [EXCLUSIVE] [MIN:1- MAX:999]

/\_/\_/\_/\_/ months [EXCLUSIVE] [MIN:1- MAX:999]

/\_/\_/\_/\_/ years [EXCLUSIVE] [MIN:1 – MAX: AGE\_ALGO-Q18]

- 1. I do not remember

**NEW WEB PAGE**

**ASK Q23 IF Q20 = 1**

**Q23.** Approximately, at what age were you diagnosed by a physician for your acne on your [IF S19 = 3 SHOW: chest / IF S19 = 4 SHOW: back]?

/\_/\_/\_/ years old

**RANGE: Q18 to AGE\_ALGO**

- 1. I do not remember

**NEW WEB PAGE**

**Q24.** Which symptoms / signs of acne on your [IF S19 = 3 SHOW: chest / IF S19 = 4 SHOW: back] have you ever experienced?

Several answers possible

**PROG: MULTIPLE ANSWERS**

**PROG: SHOW THE SAME LIST OF ANSWER AS Q6**

**SHOW AN ERROR MESSAGE IF SYMPTOMS SELECTED IN Q19 ARE NOT SELECTED IN Q24**

**NEW WEB PAGE**

**Q25.** Please specify which area(s) of your [IF S19 = 3 SHOW: chest / IF S19 = 4 SHOW: back] have ever been affected by your acne.

Several answers possible

**PROG: MULTIPLE ANSWERS**

**PROG: SHOW IF S19 = 3**

**PROG: SHOW IF S19 = 4**

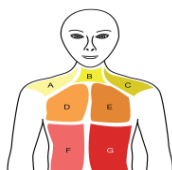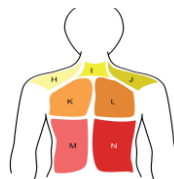

1 = Right front shoulders (A)

2= Front neck (B)

3= Left front shoulder (C)

4= Right upper chest (D)

**Q26.** 5= Left upper chest (E)

6= Right lower chest (F)

7= Left lower chest (G)

98 I do not know

8= Right back shoulders (J)

9= Back neck (I)

10= Left back shoulder (H)

11= Right upper back (L)

12= Left upper back (K)

13= Right lower back (N)

14= Left lower back (M)

99 I do not know

Only

**PROG: SINGLE ANSWER**

- 1. Appear only when you have an acne breakout/flare
- 2. Are nearly always present and worsen when you have an acne breakout/flare
- 3. Are nearly always present and you do not experience breakout/flare (i.e. are almost consistently the same over time)

**IOW: chest /**

NEW WEB PAGE

**PROG: SHOW FOR EVERY RESPONSE TICKED IN Q24**

**Q27. Any time in the past 12 months, have you experienced [INSERT RESPONSE IN Q24] on your [ IF S19 = 3 SHOW: chest / IF S19 = 4 SHOW: back? SHOW PHOTO FROM Q6 NEXT TO EACH SYMPTOM**

*Only one answer possible*

**PROG: SINGLE ANSWER**

1. Never
2. Episodically
3. Only during flares/breakouts **[SHOW ONLY IF Q26 = 1 OR 2]**
4. Permanently

**PROG: CREATE A VARIABLE: SYMPTOMS/SIGNS IN THE TRUNK THE PAST 12 MONTHS WITH EACH SYMPTOM TICKED IN Q24 AND IF Q27 DIFFERENT FROM 1**

NEW WEB PAGE

**Q28. Any time in the past 12 months, please specify which area(s) of your [IF S19 = 3 SHOW: chest / IF S19 = 4 SHOW: back] have been affected by your acne?**

*Several answers possible*

**PROG: MULTIPLE ANSWERS**

**PROG:SHOW IF S19 = 3**

**PROG: SHOW IF S19 = 4**

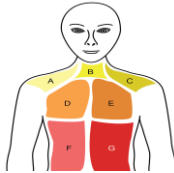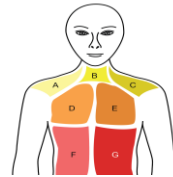

- 1 = Right front shoulders (A)
- 2= Front neck (B)
- 3= Left front shoulder (C)
- 4= Right upper chest (D)
- 5= Left upper chest (E)
- P** 6= Right lower chest (F)
- T** 7= Left lower chest (G)
- Q** 998 I do not know

- 8= Right back shoulders (J)
- 9= Back neck (I)
- 10= Left back shoulder (H)
- 11= Right upper back (L)
- 12= Left upper back (K)
- 13= Right lower back (N)
- 14= Left lower back (M)
- 999 I do not know

**NK IN**

**IF S19**  
Please

do not consider acne scars when answering this section.

**SHOW PHOTO FROM Q6 NEXT TO EACH SYMPTOM**

**SCALE FROM 0 TO 10**

**EACH ITEMS FROM THE VARIABLE SYMPTOMS IN THE TRUNK IN THE PAST 12 MONTHS**

Not manageable at all Extremely easy to manage  
 0-----1-----2-----3-----4-----5-----6-----7-----8-----9-----10

NEW WEB PAGE

**Q30.** Generally speaking, would you say that your acne on your [ **IF S19 = 3 SHOW: chest / IF S19 = 4 SHOW: back**] has been under control in the past 12 months? Please do not consider acne scars when answering this section.

*Only one possible answer*

**PROG: SINGLE ANSWER**

1. Yes, totally
2. Yes partially
3. Not at all

**NEW WEB PAGE**

**Q31. What activities/behaviours did/do you avoid because of your acne on your [ IF S19 = 3 SHOW: chest / IF S19 = 4 SHOW: back?**

**Please think of all changes / adaptations you may have made since the 1<sup>st</sup> symptoms of your acne on your [IF S19 = 3 SHOW: chest / IF S19 = 4 SHOW: back.**

**PROG: SEVERAL ANSWERS POSSIBLE**

**PROG: MULTIPLE ANSWERS**

**PROG: RANDOMIZATION OF ITEMS**

**You avoid/try avoiding ...**

1. Going to the swimming pool, beach or sauna
2. Going in public without make-up
3. Video chatting
4. Having your photo taken
5. Joining and/or staying on social media
6. Eating/drinking certain foods/beverages
7. Exposing yourself to the sun
8. Doing physical exercise, sport
9. Going out with people / doing social activities
10. Dating or having romantic/intimate relationships
11. Visiting relatives
12. Adopting a given hairstyle that may makes your acne more visible
13. Travelling
14. Participating in certain extracurricular activities at school, university, etc
15. Shopping
16. Choosing a given career path
17. Shaving or not shaving **[ASK ONLY IF GENDER\_ALGO=1]**
18. Wearing clothes that make your acne scars more visible
19. Applying to job positions that require visual public contact **[ASK ONLY TO TARGET 1]**
20. Others (please specify) **OPEN ENDED**
21. You never avoid any activities/behaviours **[EXCLUSIVE]**

**NEW WEB PAGE**

**Q32. How much do you adjust your daily activities or behaviour because of acne on your [IF S19 = 3 SHOW: chest / IF S19 = 4 SHOW: back]?**

**PROG: USE GRID MATRIX NUMBERS TEXT OPTION**

**SCALE FROM 0 TO 10**

0-----1-----2-----3-----4-----5-----6-----7-----8-----9-----10

|                                                                                                                                         |  |                                                                                                                                             |
|-----------------------------------------------------------------------------------------------------------------------------------------|--|---------------------------------------------------------------------------------------------------------------------------------------------|
| <b>0=You do not adjust your daily activities or behaviour because of acne on your [ IF S19 = 3 SHOW: chest / IF S19 = 4 SHOW: back]</b> |  | <b>10= You extremely adjust your daily activities or behaviour because of acne on your [IF S19 = 3 SHOW: chest / IF S19 = 4 SHOW: back]</b> |
|-----------------------------------------------------------------------------------------------------------------------------------------|--|---------------------------------------------------------------------------------------------------------------------------------------------|

**END OF BLOCK 2 (Truncal questions)**

**Part 4: TREATMENTS**

**NEW WEB PAGE**

On the next questions, we will be focusing on the treatment(s) for your acne within the past 12 months.

**NEW WEB PAGE**

**Q33.** For each of the following treatments that you have taken for your facial [**SHOW ONLY IF TRUNCAL GROUP: and/or truncal**] acne within the past 12 months, please indicate if it is still on-going or if it has ended.

**PROG: SHOW ONLY THE TREATMENTS SELECTED IN S18**

|   | <b>Q34.1. Treatments</b> | <b>Q34.2 Do you use/used this treatment for...</b>                                                               | <b>Q34.3. Is this treatment...</b>                                                                                                                                                        |
|---|--------------------------|------------------------------------------------------------------------------------------------------------------|-------------------------------------------------------------------------------------------------------------------------------------------------------------------------------------------|
| 1 |                          | 1. Your <b>facial</b> acne                                                                                       | <b>SHOW IF Q34.2 = 1</b><br>1. On-going, used routinely (daily or most days)<br>2. On-going, used occasionally (as and when required)<br>3. Ended within last 12 months, no longer using. |
|   |                          | 2. <b>SHOW ONLY IF TRUNCAL GROUP</b> Your acne on your [ <b>IF S19 = 3 SHOW: chest / IF S19 = 4 SHOW: back</b> ] | <b>SHOW IF Q34.2 = 2</b><br>1. On-going, used routinely (daily or most days)<br>2. On-going, used occasionally (as and when required)<br>3. Ended within last 12 months, no longer using. |
| 2 | ...                      | 3. <b>SHOW ONLY IF TRUNCAL GROUP</b> Both facial and truncal acne                                                | <b>SHOW IF Q34.2 = 3</b><br>1. On-going, used routinely (daily or most days)<br>2. On-going, used occasionally (as and when required)<br>3. Ended within last 12 months, no longer using. |
| 2 |                          |                                                                                                                  |                                                                                                                                                                                           |

**NEW WEB PAGE**

**SHOW FOR EACH TREATMENT SELECTED IN S18**

**Q34. On a scale from 0 to 10, how would rate your satisfaction towards your [INSERT TREATMENT NAME IN S18 IF Q34.3=1] for your...**

|                                                                                                                     |                                                                                                          |
|---------------------------------------------------------------------------------------------------------------------|----------------------------------------------------------------------------------------------------------|
| <b>PROG: SHOW ONLY IF Q34.2=1 OR Q34.2=3</b><br>Q35.1 Acne on your face                                             | Not at all satisfied<br>0-----1-----2-----3-----4-----5-----6-----7-----8-----9-----10<br>Very satisfied |
| <b>PROG: SHOW ONLY IF Q34.2=2 OR Q34.2=3</b><br>Q35.2 Acne on your [IF S19 = 3 SHOW: chest / IF S19 = 4 SHOW: back] | Not at all satisfied<br>0-----1-----2-----3-----4-----5-----6-----7-----8-----9-----10<br>Very satisfied |

**NEW WEB PAGE**

**SHOW FOR EACH TREATMENT SELECTED IN S18 I**

**Q35. On a scale from 0 to 10, overall, how effective do you find [INSERT TREATMENT NAME IN S18 IF Q34.3=1] on your symptoms/signs of acne?**

**PROG: SHOW A SCALE FROM 0 TO 10**

|                                                                                                                      |                                                                                                                            |
|----------------------------------------------------------------------------------------------------------------------|----------------------------------------------------------------------------------------------------------------------------|
| <b>PROG: SHOW ONLY IF Q34.2=1 OR Q34.2=3</b><br>Q36.1 Acne on your face                                              | Not at all effective<br>Effective<br>0-----1-----2-----3-----4-----5-----6-----7-----8-----9-----10<br>Extremely effective |
| <b>PROG: SHOW ONLY IF Q34.2 =2 OR Q34.2=3</b><br>Q36.2 Acne on your [IF S19 = 3 SHOW: chest / IF S19 = 4 SHOW: back] | Not at all effective<br>Extremely effective<br>0-----1-----2-----3-----4-----5-----6-----7-----8-----9-----10              |

**NEW WEB PAGE**

**ASK Q37 IF Q34.3 = 1 FOR AT LEAST ONE TREATMENT  
SHOW FOR EACH TREATMENT WITH Q34.3 = 1**

**Q36. For a variety of reasons, it is possible that a person does not take 100% of his/her treatments as prescribed by the physician. On the scale below, 0% means you never took your treatment, 50% means that you took it about half as often as prescribed, 100% means that you took it completely as prescribed. What percentage of the prescribed dose of your treatment did you take in past few weeks/months for your...**

**PROG: SHOW A SCALE FROM 0% TO 100%**

|                                                                                                          |                                                                                                                                     |
|----------------------------------------------------------------------------------------------------------|-------------------------------------------------------------------------------------------------------------------------------------|
| <b>PROG: SHOW ONLY Q34.2=1</b><br>Q37.1 Acne on your face                                                | Treatment not taken at all<br>0%-----10--- -20---30---40---50---60---70-- -80--- -90-----100%<br>All treatments taken as prescribed |
| <b>PROG: SHOW ONLY IF Q34.2=2</b><br>Q37.2 Acne on your [IF S19 = 3 SHOW: chest / IF S19 = 4 SHOW: back] | Treatment not taken at all<br>0%-----10--- -20---30---40---50---60---70-- -80--- -90-----100%<br>All treatments taken as prescribed |
| <b>PROG: SHOW ONLY IF Q34.2=3</b><br>Q37.3 Acne on your face and trunk                                   | Treatment not taken at all<br>0%-----10--- -20---30---40---50---60---70-- -80--- -90-----100%<br>All treatments taken as prescribed |





I am confident about my physician's ability to effectively manage my acne on my [ IF S19 = 3 SHOW:  
chest / IF S19 = 4 SHOW: back]

**PROG: SHOW A SCALE FROM 0 TO 10**

Not at all

0-----1-----2-----3-----4-----5-----6-----7-----8-----9-----10

Very much

**PART 7: QUALITY OF LIFE**

**NEW WEB PAGE**

**Q41.** On a scale from 0 to 10, how would you rate the level of impact ACNE has had on your quality of life over the last week? Please do not consider acne scars when answering this question.

0 means 'no impact' and 10 means 'very high impact'

**SCALE FROM 0 TO 10**

No impact  
0-----1-----2-----3-----4-----5-----6-----7-----8-----9-----10  
Very high impact

**NEW WEB PAGE**

**PROG: SHOW ONLY IF TRUNCAL GROUP**

**Q42.** On a scale from 0 to 10, how would you rate the level of impact that acne on your face and on your [IF S19 = 3 SHOW: chest / IF S19 = 4 SHOW: back] has had on your quality of life over the last week? Please do not consider acne scars when answering this question.

0 means 'no impact' and 10 means 'very high impact'

**SCALE FROM 0 TO 10**

|                                                                                                              |                                                                                                 |
|--------------------------------------------------------------------------------------------------------------|-------------------------------------------------------------------------------------------------|
| <b>Q43.1</b> Acne on your face                                                                               | No impact<br>0-----1-----2-----3-----4-----5-----6-----7-----8-----9-----10<br>Very high impact |
| <b>[SHOW ONLY FOR TRUNCAL]</b><br><b>Q43.2</b> Acne on your [IF S19 = 3 SHOW: chest / IF S19 = 4 SHOW: back] | No impact<br>0-----1-----2-----3-----4-----5-----6-----7-----8-----9-----10<br>Very high impact |

**NEW WEB PAGE**

**DERMATOLOGY LIFE QUALITY INDEX (DLQI)**

**NEW WEB PAGE**

On the next screens you will be asked to answer a series of questions that are part of a validated scales questionnaire, meaning that they have been developed to be most efficient and effective for use in research and clinical settings, in this case, to assess how much your acne affects you.

Please do not consider acne scars when answering questions in this section.

**NEW WEB PAGE**

**ASK Q44 TO Q54 IF AGE\_ALGO >=16**

The aim of this questionnaire is to measure how much your skin problem has affected you OVER THE LAST WEEK. Please tick ✓ one box for each question.

**PN: TO INCLUDE AT THE BOTTOM OF THE PAGE FOR EACH QUESTION OF THIS SECTION:**

© Dermatology Life Quality Index. A Y Finlay, G K Khan, April 1992

**NEW WEB PAGE**

**Q43.** Over the last week, how itchy, sore, painful or stinging has your skin been?

**PROG: SINGLE ANSWER**

1. Very much
2. A lot
3. A little
4. Not at all

**NEW WEB PAGE**

**Q44.** Over the last week, how **embarrassed** or **self-conscious** have you been because of your skin?

**PROG: SINGLE ANSWER**

1. Very much
2. A lot
3. A little
4. Not at all

**NEW WEB PAGE**

**Q45.** Over the last week, how much has your skin interfered with you going **shopping** or looking after your **home** or **garden**?

**PROG: SINGLE ANSWER**

1. Very much
2. A lot
3. A little
4. Not at all
5. Not relevant

**NEW WEB PAGE**

**Q46.** Over the last week, how much has your skin influenced the **clothes** you wear?

**PROG: SINGLE ANSWER**

1. Very much
2. A lot
3. A little
4. Not at all
5. Not relevant

**NEW WEB PAGE**

**Q47.** Over the last week, how much has your skin affected any **social** or **leisure** activities?

**PROG: SINGLE ANSWER**

1. Very much
2. A lot
3. A little
4. Not at all
5. Not relevant

**NEW WEB PAGE**

**Q48.** Over the last week, how much has your skin made it difficult for you to do any **sport**?

**PROG: SINGLE ANSWER**

1. Very much
2. A lot
3. A little
4. Not at all
5. Not relevant

**NEW WEB PAGE**

**Q49.** Over the last week, has your skin prevented you from **working** or **studying**?

**PROG: SINGLE ANSWER**

1. Yes
2. No
3. Not relevant

**NEW WEB PAGE**

**ASK Q51 IF Q50= 2**

**Q50.** Over the last week how much has your skin been a problem at **work** or **studying**?

**PROG: SINGLE ANSWER**

1. A lot
2. A little
3. Not at all

**NEW WEB PAGE**

**Q51.** Over the last week, how much has your skin created problems with your **partner** or any of your **close friends** or **relatives**?

**PROG: SINGLE ANSWER**

1. Very much
2. A lot
3. A little
4. Not at all
5. Not relevant

**NEW WEB PAGE**

**Q52.** Over the last week, how much has your skin caused any **sexual difficulties**?

**PROG: SINGLE ANSWER**

1. Very much
2. A lot
3. A little
4. Not at all
5. Not relevant

**PROG: LET THE RESPONDENT CONTINUE THE SURVEY BY CLICKING THE NEXT BUTTON EVEN IF THEY DIDN'T CHOOSE AN ANSWER AT Q53**

**NEW WEB PAGE**

**Q53.** Over the last week, how much of a problem has the **treatment** for your skin been, for example by making your home messy, or by taking up time?

**PROG: SINGLE ANSWER**

1. Very much
2. A lot
3. A little
4. Not at all
5. Not relevant

**NEW WEB PAGE**

**CHILDREN'S DERMATOLOGY LIFE QUALITY INDEX (CDLQI)**

**NEW WEB PAGE**

On the next screens you will be asked to answer a series of questions that are part of a validated scales questionnaire, meaning that they have been developed to be most efficient and effective for use in research and clinical settings, in this case, to assess how much your acne affects you.

Please do not consider acne scars when answering questions in this section.

**NEW WEB PAGE**

**ASK Q55 TO Q66 IF AGE\_ALGO<16**

**The aim of this questionnaire is to measure how much your skin problem has affected you OVER THE LAST WEEK. Please tick ✓ one box for each question.**

**PN: TO INCLUDE AT THE BOTTOM OF THE PAGE FOR EACH QUESTION OF THIS SECTION:**

© Children's Dermatology Life Quality Index. M S Lewis-Jones, A Y Finlay, May 1993.

**NEW WEB PAGE**

**Q54.** Over the last week, how **itchy**, "**scratchy**", **sore** or **painful** has your skin been?

**SINGLE ANSWER**

1. Very much
2. Quite a lot
3. Only a little
4. Not at all

**5. NEW WEB PAGE**

**Q55.** Over the last week, how **embarrassed** or **self conscious**, **upset** or **sad** have you been because of your skin?

**SINGLE ANSWER**

1. Very much
2. Quite a lot
3. Only a little
4. Not at all

**NEW WEB PAGE**

**Q56.** Over the last week, how much has your skin affected your **friendships**?

**SINGLE ANSWER**

1. Very much
2. Quite a lot
3. Only a little

4. Not at all

**NEW WEB PAGE**

**Q57.** Over the last week, how much have you changed or worn **different** or **special clothes/shoes** because of your skin?

**SINGLE ANSWER**

1. Very much
2. Quite a lot
3. Only a little
4. Not at all

**NEW WEB PAGE**

**Q58.** Over the last week, how much has your skin trouble affected **going out, playing, or doing hobbies**?

**SINGLE ANSWER**

1. Very much
2. Quite a lot
3. Only a little
4. Not at all

**NEW WEB PAGE**

**Q59.** Over the last week, how much have you avoided **swimming** or **other sports** because of your skin trouble?

**SINGLE ANSWER**

1. Very much
2. Quite a lot
3. Only a little
4. Not at all

**NEW WEB PAGE**

**Q60.** Last week, was it ...

**SINGLE ANSWER**

1. **School time**
2. **Holiday time**

**SHOW Q62 IF Q61 = 1**

**Q61.** **If school time:** Over the last week, how much did your skin problem affect your **school work**?

**SINGLE ANSWER**

1. Prevented school
2. Very much
3. Quite a lot
4. Only a little
5. Not at all

**SHOW Q63 IF Q61= 2**

**Q62.** **If holiday time:** How much over the last week, has your skin problem interfered with your enjoyment of the **holiday**?

**SINGLE ANSWER**

1. Very much
2. Quite a lot
3. Only a little
4. Not at all

**NEW WEB PAGE**

**Q63.** Over the last week, how much trouble have you had because of your skin with other people **calling you names, teasing, bullying, asking questions** or **avoiding you**?

**SINGLE ANSWER**

1. Very much
2. Quite a lot
3. Only a little
4. Not at all

**NEW WEB PAGE**

**Q64.** Over the last week, how much has your **sleep** been affected by your skin problem?

**SINGLE ANSWER**

1. Very much
2. Quite a lot
3. Only a little
4. Not at all

**NEW WEB PAGE**

**Q65.** Over the last week, how much of a problem has the **treatment** for your skin been?

**SINGLE ANSWER**

1. Very much
2. Quite a lot
3. Only a little
4. Not at all



**NEW WEB PAGE**

**COMPAQ Measure (Long Form)**

**Q66.** The aim of this questionnaire is to measure how much your acne skin problem has affected you **OVER THE LAST WEEK**. Please tick ✓ one box for each question.

**PN: TO INCLUDE AT THE BOTTOM OF THE PAGE FOR EACH QUESTION OF THIS SECTION:**  
© GALDERMA

We define acne as pimples, zits, or breakouts. We do **not** mean holes, dark spots, or red spots left by acne. Please do not consider acne scars when answering questions in this section.

**Thinking about the last week**, please answer the following questions about acne on your **face [SHOW IF TRUNCAL GROUP: and on your [IF S19 = 3 SHOW: chest / IF S19 = 4 SHOW: back]** using the following scale:

0            1            2            3            4            5            6            7            8  
Never            Rarely            Sometimes            Often            All the time

| Items split by domain                                                                    | Response Choices |   |   |   |   |   |   |   |   |  |
|------------------------------------------------------------------------------------------|------------------|---|---|---|---|---|---|---|---|--|
|                                                                                          | 0                | 1 | 2 | 3 | 4 | 5 | 6 | 7 | 8 |  |
| <b>A. Psychological/Emotional</b>                                                        |                  |   |   |   |   |   |   |   |   |  |
| Because of my acne...                                                                    |                  |   |   |   |   |   |   |   |   |  |
| 1. I feel depressed, sad, or upset.                                                      |                  |   |   |   |   |   |   |   |   |  |
| 2. I feel embarrassed.                                                                   |                  |   |   |   |   |   |   |   |   |  |
| 3. I feel self-conscious.                                                                |                  |   |   |   |   |   |   |   |   |  |
| 4. I feel less confident.                                                                |                  |   |   |   |   |   |   |   |   |  |
| <b>B. Social (Judgment from others)</b>                                                  |                  |   |   |   |   |   |   |   |   |  |
| Because of my acne...                                                                    |                  |   |   |   |   |   |   |   |   |  |
| 5. I feel that people stare at me.                                                       |                  |   |   |   |   |   |   |   |   |  |
| 6. I feel like people judge me.                                                          |                  |   |   |   |   |   |   |   |   |  |
| 7. People treat me differently.                                                          |                  |   |   |   |   |   |   |   |   |  |
| 8. People think less of me.                                                              |                  |   |   |   |   |   |   |   |   |  |
| <b>C. Social Interactions</b>                                                            |                  |   |   |   |   |   |   |   |   |  |
| Because of my acne...                                                                    |                  |   |   |   |   |   |   |   |   |  |
| 9. I avoid social interactions.                                                          |                  |   |   |   |   |   |   |   |   |  |
| 10. I spend less time with my friends.                                                   |                  |   |   |   |   |   |   |   |   |  |
| 11. I am concerned about meeting new people.                                             |                  |   |   |   |   |   |   |   |   |  |
| 12. I am uncomfortable showing affection to others.                                      |                  |   |   |   |   |   |   |   |   |  |
| <b>D. Treatment Concerns</b>                                                             |                  |   |   |   |   |   |   |   |   |  |
| Because of my acne...                                                                    |                  |   |   |   |   |   |   |   |   |  |
| 13. I spend a lot time taking care of my skin (at home remedies, treatments, cleansing). |                  |   |   |   |   |   |   |   |   |  |
| 14. I spend time looking at my skin.                                                     |                  |   |   |   |   |   |   |   |   |  |
| 15. I am concerned that my skin will never be clear.                                     |                  |   |   |   |   |   |   |   |   |  |
| 16. I am concerned about side effects from treatment.                                    |                  |   |   |   |   |   |   |   |   |  |
| <b>E. Physical Symptoms</b>                                                              |                  |   |   |   |   |   |   |   |   |  |
| Because of my acne...                                                                    |                  |   |   |   |   |   |   |   |   |  |
| 17. My skin feels bumpy or uneven.                                                       |                  |   |   |   |   |   |   |   |   |  |
| 18. My skin feels dirty.                                                                 |                  |   |   |   |   |   |   |   |   |  |
| 19. My skin is red.                                                                      |                  |   |   |   |   |   |   |   |   |  |
| 20. My skin causes me discomfort or pain.                                                |                  |   |   |   |   |   |   |   |   |  |

**PART 8: BEHAVIORS AND ATTITUDES**

And now we would like to ask you some questions regarding your attitudes towards acne.

**NEW WEB PAGE**

**Q67. Please read the following statements and indicate to what extent you agree or disagree with each them when it comes to your acne.**

*Only one answer per row*

**PROG: SINGLE ANSWER PER ROW**

**PROG: RANDOMIZATIONS OF ITEMS**

|    |                                                                                                                                                  | Strongly disagree | Some what disagree | Neither agree, nor disagree | Some what agree | Strongly agree | Not relevant/doesn't apply |
|----|--------------------------------------------------------------------------------------------------------------------------------------------------|-------------------|--------------------|-----------------------------|-----------------|----------------|----------------------------|
| 1  | It is something one is ashamed of                                                                                                                |                   |                    |                             |                 |                |                            |
| 2  | It is a serious condition                                                                                                                        |                   |                    |                             |                 |                |                            |
| 3  | Is not taken seriously by my doctor/ My physician does not understand the true impact of my acne                                                 |                   |                    |                             |                 |                |                            |
| 4  | It holds me back from doing things I'd like to do                                                                                                |                   |                    |                             |                 |                |                            |
| 5  | I can't control or do anything about it.                                                                                                         |                   |                    |                             |                 |                |                            |
| 6  | I would do anything necessary to reduce the possibility of scarring due to my acne                                                               |                   |                    |                             |                 |                |                            |
| 7  | People make negative comments about my skin                                                                                                      |                   |                    |                             |                 |                |                            |
| 8  | I feel /felt embarrassed to talk about my acne with friends and/or close relatives                                                               |                   |                    |                             |                 |                |                            |
| 9  | I am embarrassed to talk about my acne with physicians                                                                                           |                   |                    |                             |                 |                |                            |
| 10 | Because of my acne I have been bullied, verbally (i.e. called names) and/or physically abused                                                    |                   |                    |                             |                 |                |                            |
| 11 | I have lost interest in my appearance                                                                                                            |                   |                    |                             |                 |                |                            |
| 12 | I would like to know more about it                                                                                                               |                   |                    |                             |                 |                |                            |
| 13 | My acne does not allow others to see me for who I am                                                                                             |                   |                    |                             |                 |                |                            |
| 14 | My physician(s) do(es) not involve me in decisions about my treatment                                                                            |                   |                    |                             |                 |                |                            |
| 15 | I am not bothered by my acne as a lot of my friends also have acne                                                                               |                   |                    |                             |                 |                |                            |
| 16 | I worry about getting scars because of my acne                                                                                                   |                   |                    |                             |                 |                |                            |
| 17 | I avoid undressing in front of my spouse/partner/friends/relatives because of my truncal acne<br><b>[SHOW ONLY TO TRUNCAL GROUP]</b>             |                   |                    |                             |                 |                |                            |
| 18 | I feel I have to hide my acne in public ( e.g. by using creams and makeup products, changing my hair and/or clothing style, etc.)                |                   |                    |                             |                 |                |                            |
| 19 | Because of my acne I receive(d) what I regard as unfair treatment at school [ <b>SHOW ONLY TO TARGET 1: and/or at work]</b>                      |                   |                    |                             |                 |                |                            |
| 20 | I feel unattractive because of my facial acne                                                                                                    |                   |                    |                             |                 |                |                            |
| 21 | I feel unattractive because of my truncal acne <b>[ASK ONLY TO TRUNCAL GROUP]</b>                                                                |                   |                    |                             |                 |                |                            |
| 22 | I feel/felt isolated because of my acne                                                                                                          |                   |                    |                             |                 |                |                            |
| 23 | <b>ASK IF TARGET 1:</b> I missed a work opportunity and/or a work promotion because of my acne                                                   |                   |                    |                             |                 |                |                            |
| 24 | My acne affects(ed) negatively my school performance                                                                                             |                   |                    |                             |                 |                |                            |
| 25 | <b>ASK ONLY TO TARGET 1</b> My acne affects(ed) negatively my work performance                                                                   |                   |                    |                             |                 |                |                            |
| 26 | Continuous and impractical treatment regimens for my acne interfere with my daily life                                                           |                   |                    |                             |                 |                |                            |
| 27 | I care more about the emotional impact of my acne today than about the potential long-term impact of treatment (e.g. antibiotic resistance, etc) |                   |                    |                             |                 |                |                            |

|    |                                                                                                |  |  |  |  |  |  |
|----|------------------------------------------------------------------------------------------------|--|--|--|--|--|--|
| 28 | I would not want my child to have acne                                                         |  |  |  |  |  |  |
| 29 | Even a small improvement in my facial acne would be worthwhile                                 |  |  |  |  |  |  |
| 30 | Even a small improvement in my truncal acne would be worthwhile                                |  |  |  |  |  |  |
| 31 | I feel others consider my truncal acne as a lack of hygiene <b>[ASK ONLY TO TRUNCAL GROUP]</b> |  |  |  |  |  |  |

**NEW WEB PAGE**

**Q68.** Which of the following do you most associate with how you feel about your acne? Please select the 5 answers that best describe your feelings towards your acne. You can select up to 5 answers.

**PROG: MULTIPLE ANSWERS**

**PROG: RANDOMISATION OF ITEMS**

**PROG: ALLOW UP TO 5 ANSWERS**

|                                    |
|------------------------------------|
| 1. Frustrated                      |
| 2. Bothered                        |
| 3. Angry                           |
| 4. Stressed                        |
| 5. Low self-esteem                 |
| 6. Uncomfortable                   |
| 7. Sad                             |
| 8. Fearful / afraid of social life |
| 9. Insecure                        |
| 10. Ashamed                        |
| 11. Powerless                      |
| 12. Rejected                       |
| 13. Defeated                       |
| 14. Isolated                       |
| 15. Exhausted                      |
| 16. Depressed                      |
| 17. Embarrassed                    |
| 18. Guilty                         |
| 19. Low confidence                 |
| 20. Fed up                         |
| 21. Despaired                      |
| 22. Lonely                         |
| 23. Ugly                           |
| 24. Anxious                        |
| 25. Resigned                       |

**NEW WEB PAGE**

**ASK Q70 IF MORE THAN ONE ANSWER IS SELECTED IN Q69**

**Q69.** Among these **[NUMBER OF RESPONSES IN Q68]** feelings that you associate with how you feel about acne, which one do you associate with the most?

*Only one answer possible.*

**PROG: SINGLE ANSWER**

**PROG: SHOW ITEMS SELECTED IN Q69**

**NEW WEB PAGE**

**Q70.** Which of the remaining do you least associate with how you feel about your acne? Please select the 5 answers that least describe your feelings towards your acne.

*You can select up to 5 answers.*

**PROG: MULTIPLE ANSWERS**  
**PROG: ALLOW UP TO 5 ANSWERS**  
**PROG: RANDOMISATION OF ITEMS**  
**PROG: IN Q71 SHOW ITEMS FROM Q69 NOT SELECTED IN Q69**

**NEW WEB PAGE**

**ASK Q72 IF MORE THAN ONE ANSWER IS SELECTED IN Q71**  
**Q71.** Among these [NUMBER OF RESPONSES IN Q71] feelings that you least associate with how you feel about acne, which one do you associate the least?  
*Only one answer possible.*  
**PROG: SINGLE ANSWER**  
**PROG: SHOW ITEMS SELECTED IN Q70**

**NEW WEB PAGE**

**Q72.** Regarding your acne, do you think about it ~~them~~ a lot and wish you could think about it less?

|                                                                                                                    |                                                                                   |
|--------------------------------------------------------------------------------------------------------------------|-----------------------------------------------------------------------------------|
| <b>Q73.1</b> Acne on your face                                                                                     | <i>Only one answer possible.</i><br><b>PROG: SINGLE ANSWER</b><br>1. Yes<br>2. No |
| <b>[SHOW ONLY FOR TRUNCAL GROUP]</b><br><b>Q73.2</b> Acne on your [IF S19 = 3 SHOW: chest / IF S19 = 4 SHOW: back] | <i>Only one answer possible.</i><br><b>PROG: SINGLE ANSWER</b><br>1. Yes<br>2. No |

**NEW WEB PAGE**

**Q73.** How much time do you spend thinking about your ~~atrophic~~ acne scars per day on average? (add up all the time you spend)

|                                                                                                                    |                                                                                                                                                             |
|--------------------------------------------------------------------------------------------------------------------|-------------------------------------------------------------------------------------------------------------------------------------------------------------|
| <b>Q74.1</b> Acne on your face                                                                                     | <i>Only one answer possible.</i><br><b>PROG: SINGLE ANSWER</b><br>1. Less than 1 hour a day<br>2. Between 1 and 3 hours a day<br>3. More than 3 hours a day |
| <b>[SHOW ONLY FOR TRUNCAL GROUP]</b><br><b>Q74.2</b> Acne on your [IF S19 = 3 SHOW: chest / IF S19 = 4 SHOW: back] | <i>Only one answer possible.</i><br><b>PROG: SINGLE ANSWER</b><br>1. Less than 1 hour a day<br>2. Between 1 and 3 hours a day<br>3. More than 3 hours a day |

**PART 9: GALDERMA TYPING TOOL FOR PATIENT SEGMENTATION**

**NEW WEB PAGE**

**Q74. Please indicate how strongly you agree or disagree with each of the following statements**

*Only one answer possible*

**PROG: SINGLE ANSWER**

**PROG: RATE FROM:**

- 1 Strongly disagree
- 2 Disagree
- 3 Somewhat disagree
- 4 Somewhat agree
- 5 Strongly agree

**PROG: ITEMS THAT NEED TO BE RATED**

**PROG: RANDOMISATION OF ITEMS**

- 1 I am not bothered by my acne as a lot of my friends also have acne
- 2 My acne does not allow others to see me for who I am
- 3 I feel restricted in the types of activities I can do because of my acne (e.g. I do not go to the beach or swim because of the acne on my back or chest)
- 4 A long-lasting effective acne treatment is the most important to me/my parents
- 5 I select the acne treatment that is the most affordable to me/ my parents
- 6 I/my parents will pay as much as needed to treat my acne properly
- 7 I/my parents always seek out an acne-specialist (e.g. dermatologist)
- 8 I feel I only need to treat my acne when there is a flare up, rather than everyday

**PART 10: TRADE OFF ANALYSIS**

**NEW WEB PAGE**

**SHOW FOR TARGET 2** Thank you for answering these questions. Your participation to this questionnaire is now over.

To finish this survey, we will need your parent to answer the last questions. Two minutes will be needed to end this questionnaire.

**NEW WEB PAGE**

**Q75.** On average, how much money do you spend each month on medication to treat [**SHOW FOR TARGET 1: your acne / SHOW FOR TARGET 2: the acne of your child**]

Please only take into account the medications not reimbursed by your public or private health insurance, and also specific makeup, cosmetic products.

*Only one answer possible*

**PROG: OPEN ENDED**

/ \_ / \_ / \_ / \_ / [**US AND CANADA \$ FRA GER ITA € , BRA R\$**] each month

**PROG: MIN 0 MAX 9999**

**NEW WEB PAGE**

**Q76.** How much money would you be willing to pay overall to achieve a sustainable (but not complete) cure for [**SHOW FOR TARGET 1: your acne / SHOW FOR TARGET 2: the acne of your child**]?

*Only one answer possible*

**PROG: OPEN ENDED**

/ \_ / \_ / \_ / \_ / [**US AND CANADA \$ FRA GER ITA € , BRA R\$**]

**PROG: MIN 0 MAX 9999**

**NEW WEB PAGE**

**Q77.** How much money would you be willing to pay in a single payment to achieve a complete cure for [**SHOW FOR TARGET 1: your acne / SHOW FOR TARGET 2: the acne of your child**]?

*Only one answer possible*

**PROG: OPEN ENDED**

/ \_ / \_ / \_ / \_ / [**US AND CANADA \$ FRA GER ITA € , BRA R\$**]

**PROG: MIN VALUE IN Q77 MAX 9999**

**ALLOW RESPONDENT TO GO BACK TO Q77 AND REVISE THEIR ANSWER**

**PROG: SHOW FOR TARGET 1**

**Q78.** How much of your lifetime would you be willing to give up to cure your acne (get your face completely clear)?

*Only one answer possible.*

**PROG: SINGLE ANSWER**

1. No time
2. 1 month
3. 6 months
4. 1 year
5. 2 years
6. 5 years
7. 10 years
8. More, I would give up: /\_/\_/ years **[MIN: 11 / MAX: 99]**
9. None of the above, I would give up: /\_/\_/ years **[MIN: 1 / MAX: 99]**
